# Supplementary material
Source: PubMed Central journal article supplement (PMC8379983)
Supplement: pnas.2012881118.sapp.pdf [file pnas.2012881118.sapp.pdf]

## Supporting Information

### SI Methods

#### Library preparation for RNA-seq

Total RNA was extracted by using Trizol reagent (Invitrogen) according to the manufacturer's instructions. The concentration and quality of total RNA were measured by Nanodrop and verified by gel electrophoresis. The Ribo-minus transcriptome libraries were constructed with TruSeq Ribo Profile Library Prep Kit (Illumina), according to the manufacturer's instructions. The libraries were then subjected to 150-nt paired-end sequencing generating ~100 million read pairs with an Illumina Nextseq 500 system (Novogene, China) or a BGISEQ-500 system (BGITech, China).

#### Clinical samples preparation

All fresh GC patient tumor samples and adjacent tissues were collected from the First Affiliated Hospital of Anhui Medical University, which was approved by the Human Research Ethics Committee of Anhui Medical University. Written informed consent was obtained from each patient for this study. All samples were rinsed with PBS after the operation, and then were cut into small pieces with RNAhold (TransGen, EH101-01) immersed. All samples were stored at -80°C until the time of analysis.

#### Cell culture

Human GC cell line AGS was purchased from the Culture Collection of Chinese Academy of Sciences (Chinese Academy of Sciences, Shanghai). Human GC cell lines SGC7901, BGC823, MGC803 and MKN45 were kindly provided by Dr. Chunwei Peng (Department of General Surgery, the First Affiliated Hospital of Anhui Medical University). AGS cells are derived from untreated tumor fragments belong to poor differentiated GC cells. SGC7901 cells are derived from lymph node metastasis of gastric cancer, which are moderately differentiated GC cells. MGC803, MKN45 and BGC823 cells were all derived from poorly differentiated adenocarcinomas. All the cells were maintained under standard culture conditions with DMEM containing 10% FBS at 37°C and 5% CO<sub>2</sub>. Two GC cell lines (AGS and SGC7901) were authenticated by short-tandem-repeat (STR) profiling. All cells were checked for mycoplasma by a PCR-based method as well as DAPI staining, to ensure the absence of contamination.

#### Plasmids construction and cell transfection

All plasmids were constructed with restriction-enzyme digestion and ligation or with recombinant methods (Vazyme c113-02). The backbone vector of p3×FLAG-Myc was used for constructing FLAG-tagged hnRNPM, its truncations and VEGFA isoforms. For *circURII* overexpression, the third and fourth exons of *URII* and the endogenous flanking sequence including the complementary *Alu* element pairs was inserted into the backbone vector of pcDNA3, while *circURII-M19* was constructed with the mutation of the 19-nt hnRNPM binding site in *circURII*. Further information about these plasmids is available upon request. Transfection of plasmid and siRNAs was carried out with Lipofectamine 2000 according to the manufacturer's protocol. 2'-O-methyl RNA/DNA antisense oligonucleotides (ASOs), which were modified by changing the five nucleotides at the 5' and 3' ends into 2'-O-methyl ribonucleotides, were synthesized by RiboBio (Guangzhou, China). Oligonucleotide sequences for primers used in plasmid construction, probe preparation, siRNA and biotin-labeled nucleic acids were listed in Table S5.

#### Fluorescence in situ hybridization (FISH)

RNA probes were generated with a Transcript Aid T7 High Yield Transcription Kit (Thermo Scientific), with the

corresponding insertion in the T vector as a template, and then labeled with Alexa Fluor488, by using a ULYSIS Nucleic Acid Labeling Kit (Invitrogen), which added a fluor on every G in the probe to amplify the fluorescence intensity. The primers for the amplification of the FISH antisense probe were listed in Table S5. Fixed cells and RNA probes were denatured at 80 °C for 10 min and then incubated at 42 °C for 15-17 h with 30 ng/μl human Cot-1 DNA (Life Technologies) and 500 ng/μl yeast total RNA (Ambion). For tissues, the slides were treated with 1 mg/ml proteinase K (Roche) for 1 h at 37 °C before denaturation and incubation. Slides were washed with 2× SSC at 45 °C for 10 min. For data collection, images were taken with an AndoriXonEM+ DV897KEM CCD camera mounted on an Andor Revolution XD laser confocal microscope system (Andor Technology), with Andor IQ 10.1 software.

### **Nuclear/cytosolic fractionation**

Cellular fractionation was performed as described previously with minor modifications (16). Briefly, cells were washed twice with PBS and incubated with hypotonic buffer (25 mM Tris (pH 7.4), 1 mM MgCl<sub>2</sub>, 5 mM KCl, 1% NP-40 and 50 U/mL RNase inhibitor (Promega)) on ice for 20 min. Samples were then centrifuged at 1000g for 3 min at 4 °C, and the supernatant was collected as the cytoplasmic fraction. The pellets were resuspended in nucleus resuspension buffer (20 mM HEPES (pH 7.9), 400 mM NaCl, 1 mM EDTA, 1 mM EGTA, 1 mM DTT and 1 mM PMSF), and incubated at 4°C for 30 min. Nuclear fraction was collected after removing insoluble membrane debris by centrifugation at 12000 g for 10 min.

### **Quantification of RNA copy number per cell**

The DNA fragment corresponding to *circURII* was amplified with cDNA, and then The Ct values and the amount of the purified product were used to plot standard curves through real-time PCR on a PikoReal 96 real-time PCR system (Thermo Scientific) according to standard procedures. Total RNAs of AGS and SGC7901 cells were extracted from 100,000 cells, and cDNA was then synthesized. The copy numbers per cell in each cell line were calculated on the basis of cell numbers and the Ct value by using the standard curve.

### ***CircURII* knockout via CRISPR-Cas9 technique**

To knockout *circURII* in AGS cells, four single-guide RNAs (sgRNAs) were designed based on potential off-target sites using the algorithm described at <http://crispr.mit.edu> targeted the fourth intron of human *URII*, which resulted in the deletion of the complementary repeat sequences. Firstly, AGS cells were seeded into 6-well plates at a density of 400,000 cells per well and transfected 2μg of the Cas9- and sgRNA- expressing plasmid (PX330) which was engineered with expressing mCherry and a puromycin selectable marker using Lipofectamine 2000 (Life Technologies). Then, the efficient transfection was verified by examining mCherry expression after 24h and the media was replaced with 1 μg/ml puromycin for selection after 48h. Four days later, we generated hundreds of individual colonies expressing mCherry in 96-well plates through the BD FACSAria™ III cell sorting system. After ten days, the colonies were split into two identical plates and one plate was harvested for further confirmation of genotype. Finally, we extracted genomic DNA, performed PCR using primers spanning the deleted sequence using PrimeSTAR Max (Takara) and confirmed the corresponding bands by Sanger sequencing. The primer sequences are presented in Table S5.

### **Construction of stable cell line for *circURII* knockdown**

Oligonucleotides specific for short hairpin RNAs (shRNAs) against the junction site of *circURII* were inserted into the backbone vector of pLKO.1 (Sigma). The primer sequences are presented in Table S5. Lentiviral constructs including lentivirus-shRNA for knocking down *circURII* (sh-KD) and the negative control (sh-NC) were

co-transfected with packaging plasmids psPAX2 and pMD2G into 293T cells. Infectious lentiviruses were harvested at 48h after transfection, followed with concentration by ultracentrifugation. Stable AGS cell lines were obtained by the selection with 1 µg/ml puromycin for 2 weeks.

### **PCR reactions**

RNA was extracted with TRIzol reagent (Invitrogen) according to the manufacturer's protocol. For RT-PCR, cDNA was synthesized from RNA with a GoScript Reverse Transcription System (Promega) according to the manufacturer's protocol. For PCR with template of gDNA, gDNA was isolated with phenol/chloroform extraction. Real-time quantitative PCR (RT-qPCR) was performed with GoTaq SYBR Green qPCR Master Mix (Promega) on a PikoReal 96 real-time PCR system (Thermo Scientific) according to standard procedures. For semi-quantitative RT-PCR gels, 25-30 cycles of PCR were always performed. All PCR products were sequenced for confirmation. All primer information is included in Table S5.

### **Cell cycle and apoptosis analysis**

Cells were seeded in 6-well plates at a density of  $2 \times 10^5$  cells per well. For cell cycle analysis, AGS and SGC7901 cells were harvested after treatment with siRNAs for 48 h and fixed in 70% ethanol at  $-20^\circ\text{C}$  overnight, followed by the staining with phycoerythrin. Cells were then analyzed for cell cycle distribution by flow cytometry. For cell apoptosis assay,  $10^5$  cells were collected and washed twice with ice-cold PBS, resuspended in binding buffer, treated with Annexin V-FITC and 7-AAD (BD Biosciences) and incubated in the dark for 15 min. Flow cytometry analysis was performed within 1 h to measure Annexin V-FITC positive cells (BD FACVerse).

### **iCLIP-seq and the bioinformatics**

The iCLIP experiment was carried out as described with minor modifications (38, 39). Briefly,  $5 \times 10^6$  AGS cells expressing FLAG-hnRNPM were ultraviolet crosslinked to a total of  $0.4 \text{ J/cm}^2$  in a UV cross-linker and harvested in ice-cold lysis buffer (10 mM HEPES (pH 7.4), 200 mM NaCl, 30 mM EDTA, 0.5% Triton-X 100, 1.5 mM DTT and  $1 \times$  Protease-inhibitor cocktail (Roche, 04693116001)). Then, cells were sonicated for 5 min with a Sonics Vibra-Cell, and the cell supernatant was collected after centrifugation at 12,000 g for 15 min at  $4^\circ\text{C}$ . The hnRNPM-binding complexes were isolated by anti-FLAG (Sigma, F1804) coupled with Protein G Dynabeads (Life Technology, 10004D) and partially digested with  $0.1 \text{ U}/\mu\text{l}$  RNase I (Thermo Scientific, EN0601) for 3 min at  $37^\circ\text{C}$ . After washing once with lysis buffer, twice with high salt lysis buffer (10 mM HEPES (pH 7.4), 500 mM NaCl, 30 mM EDTA, 0.5% Triton-X 100, 1.5 mM DTT,  $1 \times$  Protease-inhibitor cocktail, 50 U/ml RNasin (Promega, N2111SV)), RNAs were dephosphorylated by T4 PNK (NEB, M0201L) for 20 min at  $37^\circ\text{C}$  and then ligated at the 3' ends to a preadenylated DNA linker (5'-rApp-AGATCGGAAGAGCACACGTCTGAAC/AzideT/CCAGTCAC-3') with T4 RNA ligase I (NEB, M0204) for 60 min at  $25^\circ\text{C}$ . The IR800CW dye conjugated to the NHS-Azide modification (/AzideT/) was visualized using a near infrared imager (39). SDS-PAGE separation, visualization, protein-RNA complexes isolation, proteinase K treatment, and overnight RNA precipitation were performed as previously described (39). For iCLIP cDNA library preparation, the isolated RNAs were reverse transcribed with barcoded primers. The cDNA library was purified by PAGE, circularized by CircLigase II (Lucigen, CL9021K), PCR-amplified by NEBNext Ultra II Q5 Master Mix (NEB, M0544S) for  $\sim 25$  cycles and then subjected to high-throughput sequencing using an Illumina HiSeq2000 platform with a 50-nt run length. Sequences of all primers were listed in Table S5. For iCLIP data analysis, the randomers were registered and the 2-nt barcodes for identifying PCR duplicates were removed, followed by trimming relevant sequencing adapters. Trimmed reads were aligned to the human genome (hg19) allowing one mismatch using Bowtie (-v 1 -m 1 -a --best --strata). The genomic location of

5' end of each aligned cDNA read was considered as the cross-link nucleotide, and the cDNA counts for each cross-link nucleotide were calculated. A custom BED file was created for a window of 15 bases up and downstream of the cross-link nucleotide and a 30bp window surrounding the cross-link nucleotides was then used to identify peaks using Piranha (-b 30 -s -p 0.05). To evaluate the distribution of hnRNPM binding sites on *circURII*, iCLIP reads were aligned to the *circURII* sequence with Bowtie (-v 0 --best).

### Individual-CLIP

Individual crosslinking immunoprecipitation (individual-CLIP) was performed with the specific modifications below (39). The  $5 \times 10^6$  AGS cells were covered with ice-cold PBS buffer and irradiated in a UV cross-linker (254 nm, 400 mJ/cm<sup>2</sup>, 2 min). Upon PBS buffer removal, cells were harvested in 1ml ice-cold lysis buffer (10 mM HEPES (pH 7.4), 200 mM NaCl, 30 mM EDTA, 0.5 % Triton-X 100, 1.5 mM DTT, 1× Protease-inhibitor cocktail (Roche, 04693116001) and 50 U/ml RNasin (Promega, N2111SV)). The lysate was sonicated for 5 min with a Sonics Vibra-Cell, and the cell supernatant was collected for immunoprecipitation (IP) after centrifugation at 12,000 g for 15 min at 4 °C.

For hnRNPM IP, 50 µl Protein G-coated Dynabeads (Life Technology, 10004D) were washed with 500 µl lysis buffer twice, resuspended in 200 µl lysis buffer with 1 µg hnRNPM antibody (OriGene, TA301557). After rotation for 60 min, the antibody-Protein G beads were washed with lysis buffer twice, resuspended in 1ml cell supernatant and incubated overnight at 4 °C. The antibody-Protein G bead complexes were washed with lysis buffer once and high-salt lysis buffer (10 mM HEPES (pH 7.4), 500 mM NaCl, 30 mM EDTA, 0.5% Triton-X 100, 1.5 mM DTT, 1× Protease-inhibitor cocktail and 50 U/ml RNasin Inhibitor) twice.

The antibody-Protein G bead complexes were separated on 8 % SDS-PAGE gel in 1× MOPS running buffer (50 mM MOPS, 50 mM Tris-HCl (pH 7.7), 1 mM EDTA, 0.1% SDS). The complexes with a molecular weight corresponding to ~75–150 kD were excised and eluted overnight in 200 µl elution buffer (100 mM Tris-HCl (pH 7.8), 10 mM EDTA, 1 % SDS, 50 U/ml RNasin Inhibitor). The elution was then treated with 1 mg/ml proteinase K (Roche, 3115828001) for 10 min at 37 °C, mixed with 300 µl RNA phenol/chloroform (pH 4.2) and incubated for 5 min at 37 °C. After centrifugation for 10 min at 12,000 rpm at 4 °C, 300 µl aqueous phase was transferred into a new microtube, and mixed with 0.5 µl Glycogen (Thermo Scientific, R0551), 30 µl 3 M sodium acetate (pH 4.5) and 1 ml 100 % EtOH for overnight at -80 °C. The cross-linked RNAs were precipitated by centrifugation for 30 min at 15,000 rpm and 4 °C, washed with 500 µl 80 % EtOH and resuspended in 12 µl nuclease-free H<sub>2</sub>O.

For reverse transcription (RT), 1 µl *circURII*-specific antisense primers were mixed with 12 µl RNA, preheated for 5 min at 70 °C and then cooled on ice. 7 µl RT mix (4 µl 5× RT buffer, 1 µl 10 mM dNTPs, 1 µl 0.1 M DTT, 0.5 µl RNasin and 0.5 µl Superscript III reverse transcriptase (Thermo Scientific, 18080051)) was added, mixed by pipetting and RT was performed with the following program: 10 min at 42 °C, 40 min at 50 °C, 10 min at 55 °C. In order to remove RNA, the RT products were treated with RNaseH (Thermo Scientific, EN0201) for 10 min at 37 °C. After mixing with 80 µl H<sub>2</sub>O, 0.5 µl Glycogen, 10 µl 3 M sodium acetate (pH 4.5) and 350 µl 100 % EtOH for overnight at -80 °C, the cDNA was precipitated by centrifugation for 30 min at 15,000 rpm and 4 °C, washed with 500 µl 80 % EtOH and resuspended in 14 µl H<sub>2</sub>O.

For poly(A) addition, 14 µl purified cDNA was mixed with 4 µl 5× reaction buffer, 1 µl dATP, 1 µl Terminal Deoxynucleotidyl Transferase (Thermo Scientific, EP0161), and incubated for 30 min at 37 °C. Then, the reaction was stopped by heating for 10 min at 70 °C and the products were used for two successive rounds of PCR as followed.

The first PCR amplification was primed by a *circURII*-specific antisense oligonucleotide and an oligo(dT) primer, which contained a specific sequence at the 5' and a poly(T) tract at the 3' end (CGCTCCCCTGAATTGGAATTTTTTTTTTTTTTTTTTTT) for about 20 cycles. The second nested PCR was primed

by a *circURII*-specific antisense oligonucleotide internal to the first, and the specific sequence at the 5' of the oligo(dT) primer (CGCTCCCGCTGAATTGGAAT), based on the template of the first PCR products. The products amplified in the second PCR were isolated, cloned and subjected to Sanger sequencing (totally 24 bacterial clones of PCR products were obtained with poly(T) readings). All primer information is included in Table S5 and the raw sequences obtained from these clones were included in Table S3.

Only readings with poly(T) were used for analysis of the binding sites from hnRNPM individual-CLIP in *circURII*. Firstly, we trimmed poly(T) of the inserted sequences of the clones and aligned the sequences to *circURII*. The first nucleotide in the upstream of the sequence mapped to *circURII* was defined as the crosslink nucleotide. Multiple occurrences at the same crosslink nucleotide were counted only once. Five crosslink nucleotides of *circURII* were identified from 24 clones and the region with 2 crosslink nucleotides at a distance of no more than 15 nucleotides was deduced as the hnRNPM binding sequence.

### **Pull down of biotinylated circRNAs**

RNA pulldown was carried out as previously described, with minor modifications (60). In brief,  $10^7$  cells were lysed in 4 mL of RNA immunoprecipitation (RIP) buffer (150 mM KCl, 25 mM Tris (pH 7.4), 5 mM EDTA, 0.5 mM DTT, 0.5% NP-40, and 1×Protease-inhibitor cocktail (Roche)) for 30 min. After sonication for 10 min, cell lysates were cleared of cell debris by centrifugation at 13000 rpm for 20 min. Ten picomoles of biotinylated circRNAs were heated for 10 min to 60 °C and slow-cooled over the course of 40 min to 4 °C. RNA was mixed with 1 mg of cell lysate in RIP buffer supplemented with 0.1 mg/mL yeast total RNA, 5 mM MgCl<sub>2</sub>, and 1 U/mL RNase inhibitor (Promega) and incubated for 2 h at 4°C with gentle rotation. Twenty-five microliters of washed M280 Streptavidin magnetic Dynabeads (Invitrogen) were added to each binding reaction and further incubated for 4 h at 4 °C. Beads were harvested for the following studies after washing with supplemented RIP buffer once and supplemented RIP buffer with 500 mM NaCl twice.

Figure S1

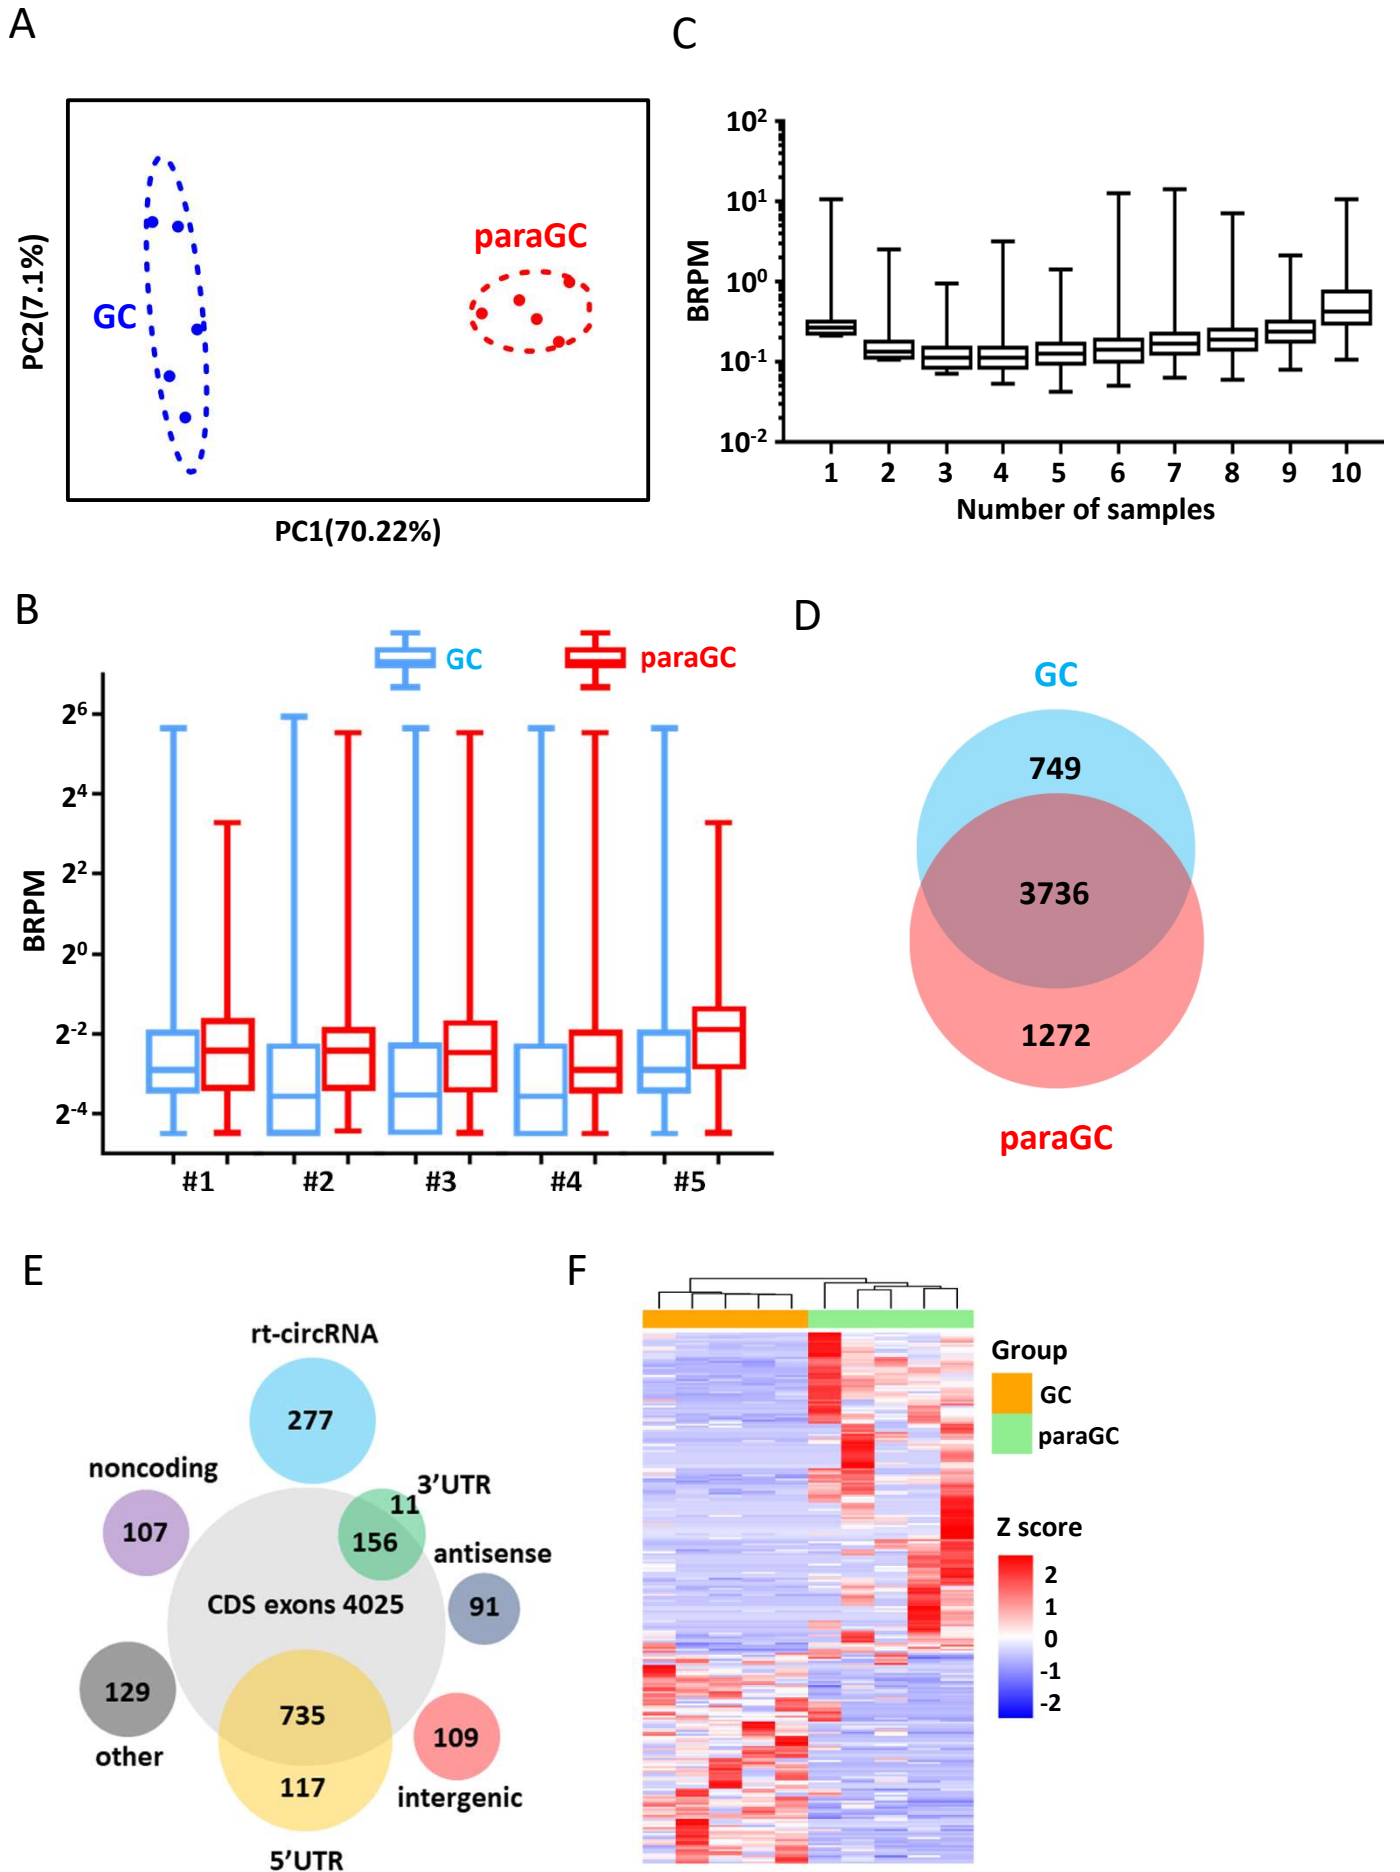

**Fig. S1.** GC circRNA profiling. (A) PCA plots of the RNA-seq dataset showing the similarities/differences between five paired GC and paraGC samples. Percentages represent variance captured by each principal component 1 and 2 in each analysis. The back-spliced reads of circRNAs and reads that mapped to annotated linear genes were counted for PCA analysis. (B) Tremendously various circRNA expression levels of 5-paired GC and paraGC samples. (C) The distribution of expression levels for circRNAs detected in ten samples. (D) Venn diagram revealing the overlap of circRNAs identified from GC and paraGC samples. (E) Genomic origin of circRNAs identified in GC samples. Greater than 95% of circRNAs overlapped with known transcripts. (F) Hierarchical cluster analysis of the differentially expressed circRNAs in 5-paired GC and paraGC samples. Red indicates a high expression level, and blue indicates a low expression level.

Figure S2

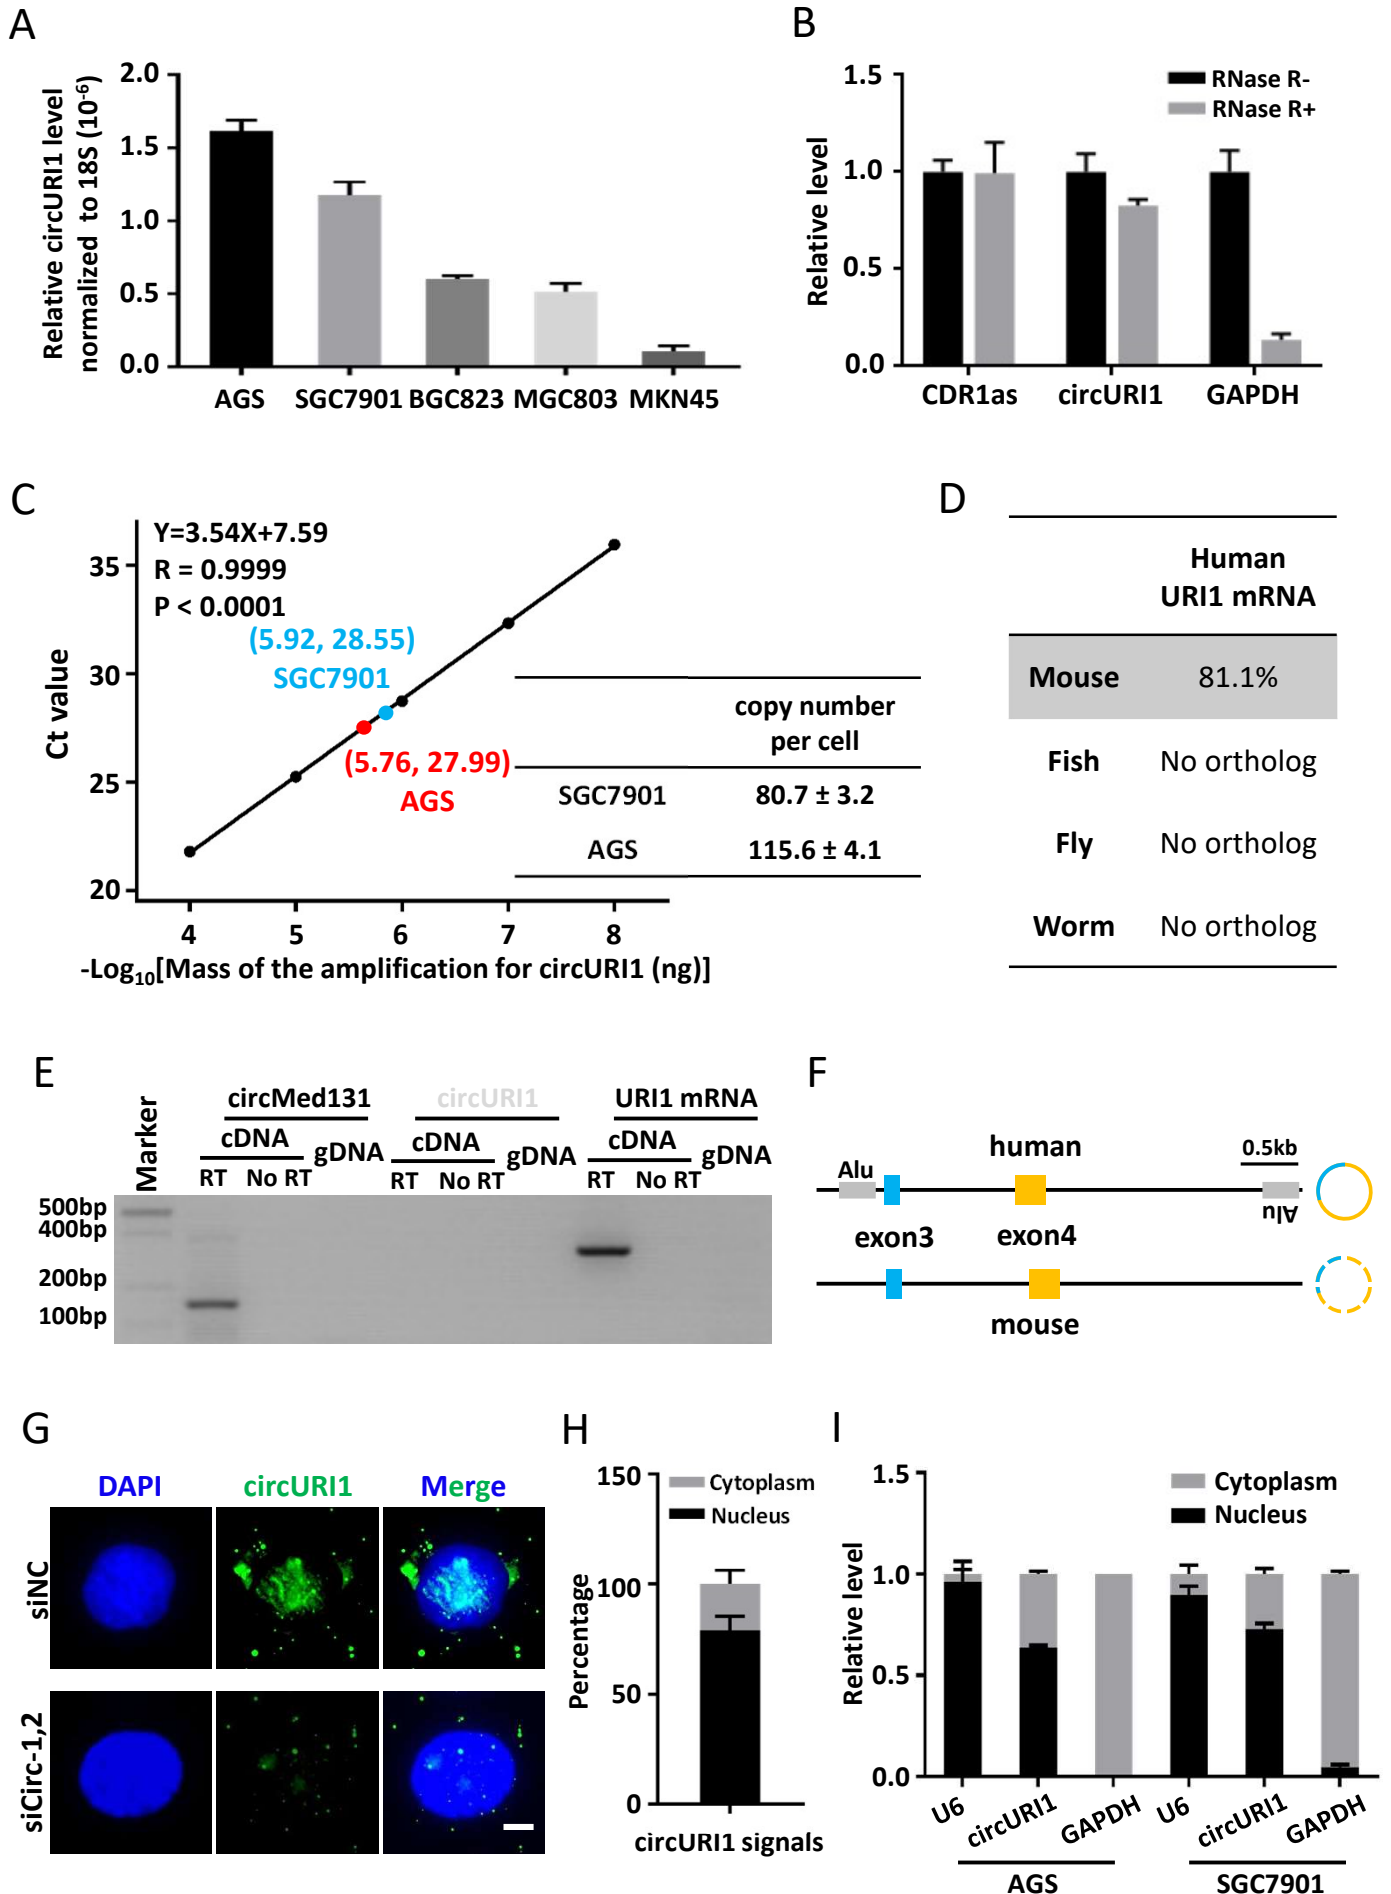



**Fig. S2.** Detection of *circURII* in human GC. (A) *CircURII* expression levels examined by RT-qPCR in 5 GC cell lines. (B) RT-qPCR analysis of *circURII* after RNase R treatment in AGS cells. *CDRIAs* was a positive control, while *GAPDH* mRNA was a negative control. (C) Quantification of *circURII* copy numbers in AGS and SGC7901 cell lines. The Ct values and the amount of purified dsDNA fragments corresponding to *circURII* amplicon were plotted to generate a standard curve by RT-qPCR. R represents Spearman's correlation coefficient and the P value was calculated by Spearman's correlation test. The red and blue dots present the Ct values and the amount of *circURII* from the cDNA used in AGS and SGC7901 cells, respectively. The inset presents the copy numbers of *circURII* in AGS and SGC7901 cells. More experimental details are available in the Methods section. (D) Homology of UR11 across species from the UCSC database. (E) RT-PCR detection of *circURII* in mice. *UR11* mRNA and *circMed131* (termed mmu\_circ\_0001396 in circBase) were both positive controls. NRC, no RT control. (F) The genomic locus of UR11 exons 3-4 in humans and mice. (G) RNA FISH of *circURII* (green) with the probe antisense to the back-spliced junction in AGS cells treated with siRNAs against *circURII*. siNC, siRNA with scrambled sequences; siCirc-1,2, two siRNAs (siCirc-1, siCirc-2) against the junction sites of *circURII*. (H) Quantification of FISH signals in AGS cells. (I) RT-qPCR analysis of *circURII* in the nuclear and cytoplasmic fractions of AGS and SGC7901 cells. Error bars, S.E.M. from three independent experiments.

Figure S3

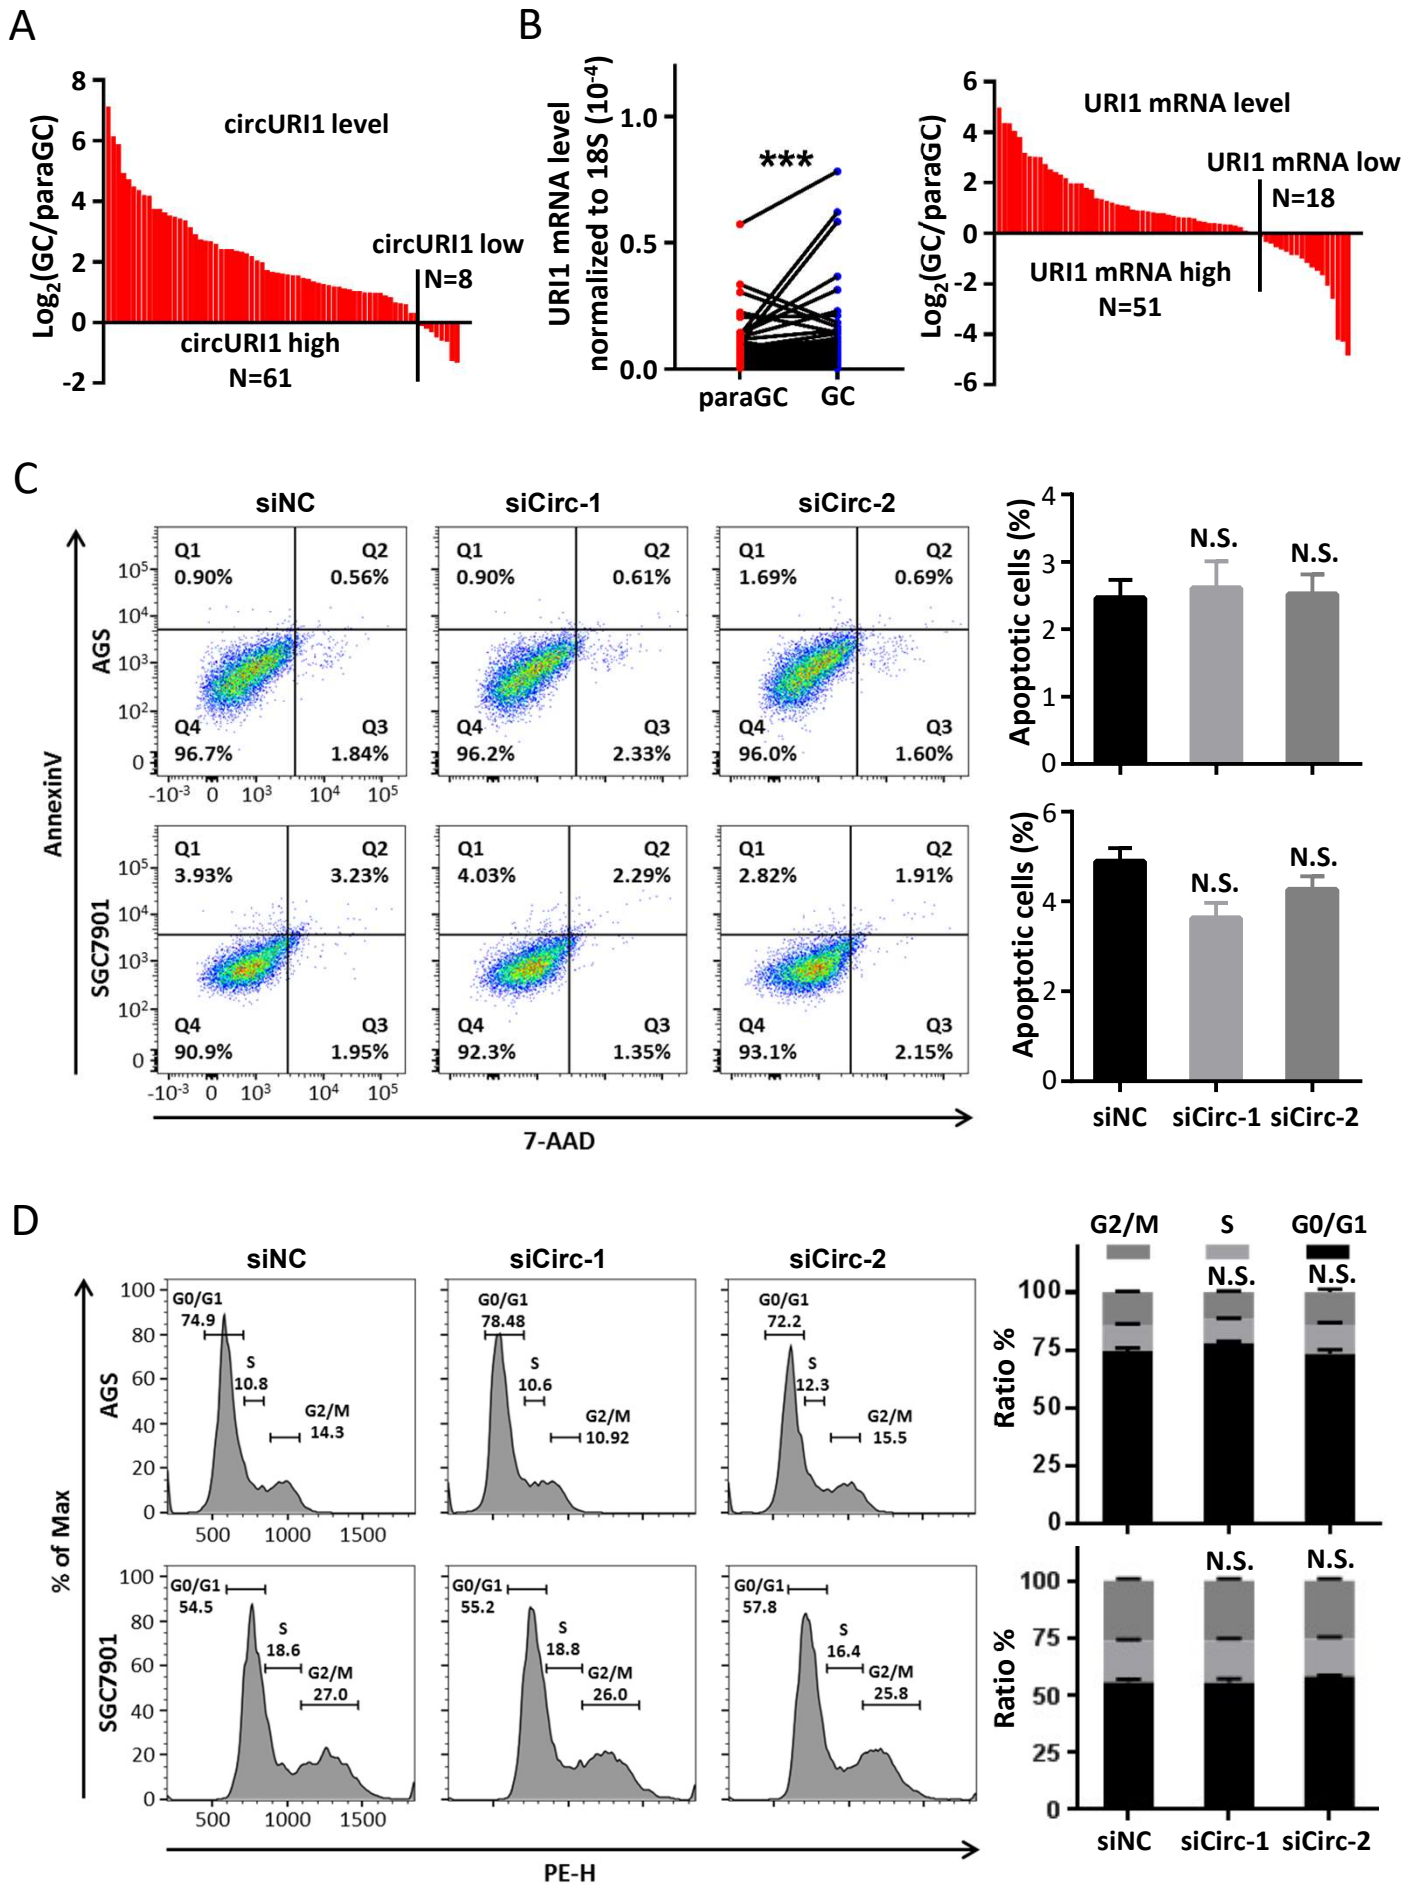

**Fig. S3.** Effects of *circURII* on cell cycle and apoptosis. (A) RT-qPCR analysis of *circURII* expression levels in 69-paired GC and paraGC tissues. The fold changes in each paired sample are arranged from high to low. The minimum change in upregulated *circURII* in GC was 1.24 compared to paraGC. (B) RT-qPCR analysis of *URII* mRNA in 69-paired GC and paraGC samples. 18S rRNA was used as the internal control. (C) Assessment of apoptosis by flow cytometry in AGS and SGC7901 cells treated with siRNAs against *circURII*. (D) Effects on cell cycle progression analyzed by flow cytometry after depleting *circURII* in AGS and SGC7901 cells. Error bars, S.E.M. from three independent experiments. N.S., not significant; \*\*\*P< 0.001 by two-tailed Student's *t*-test.

Figure S4

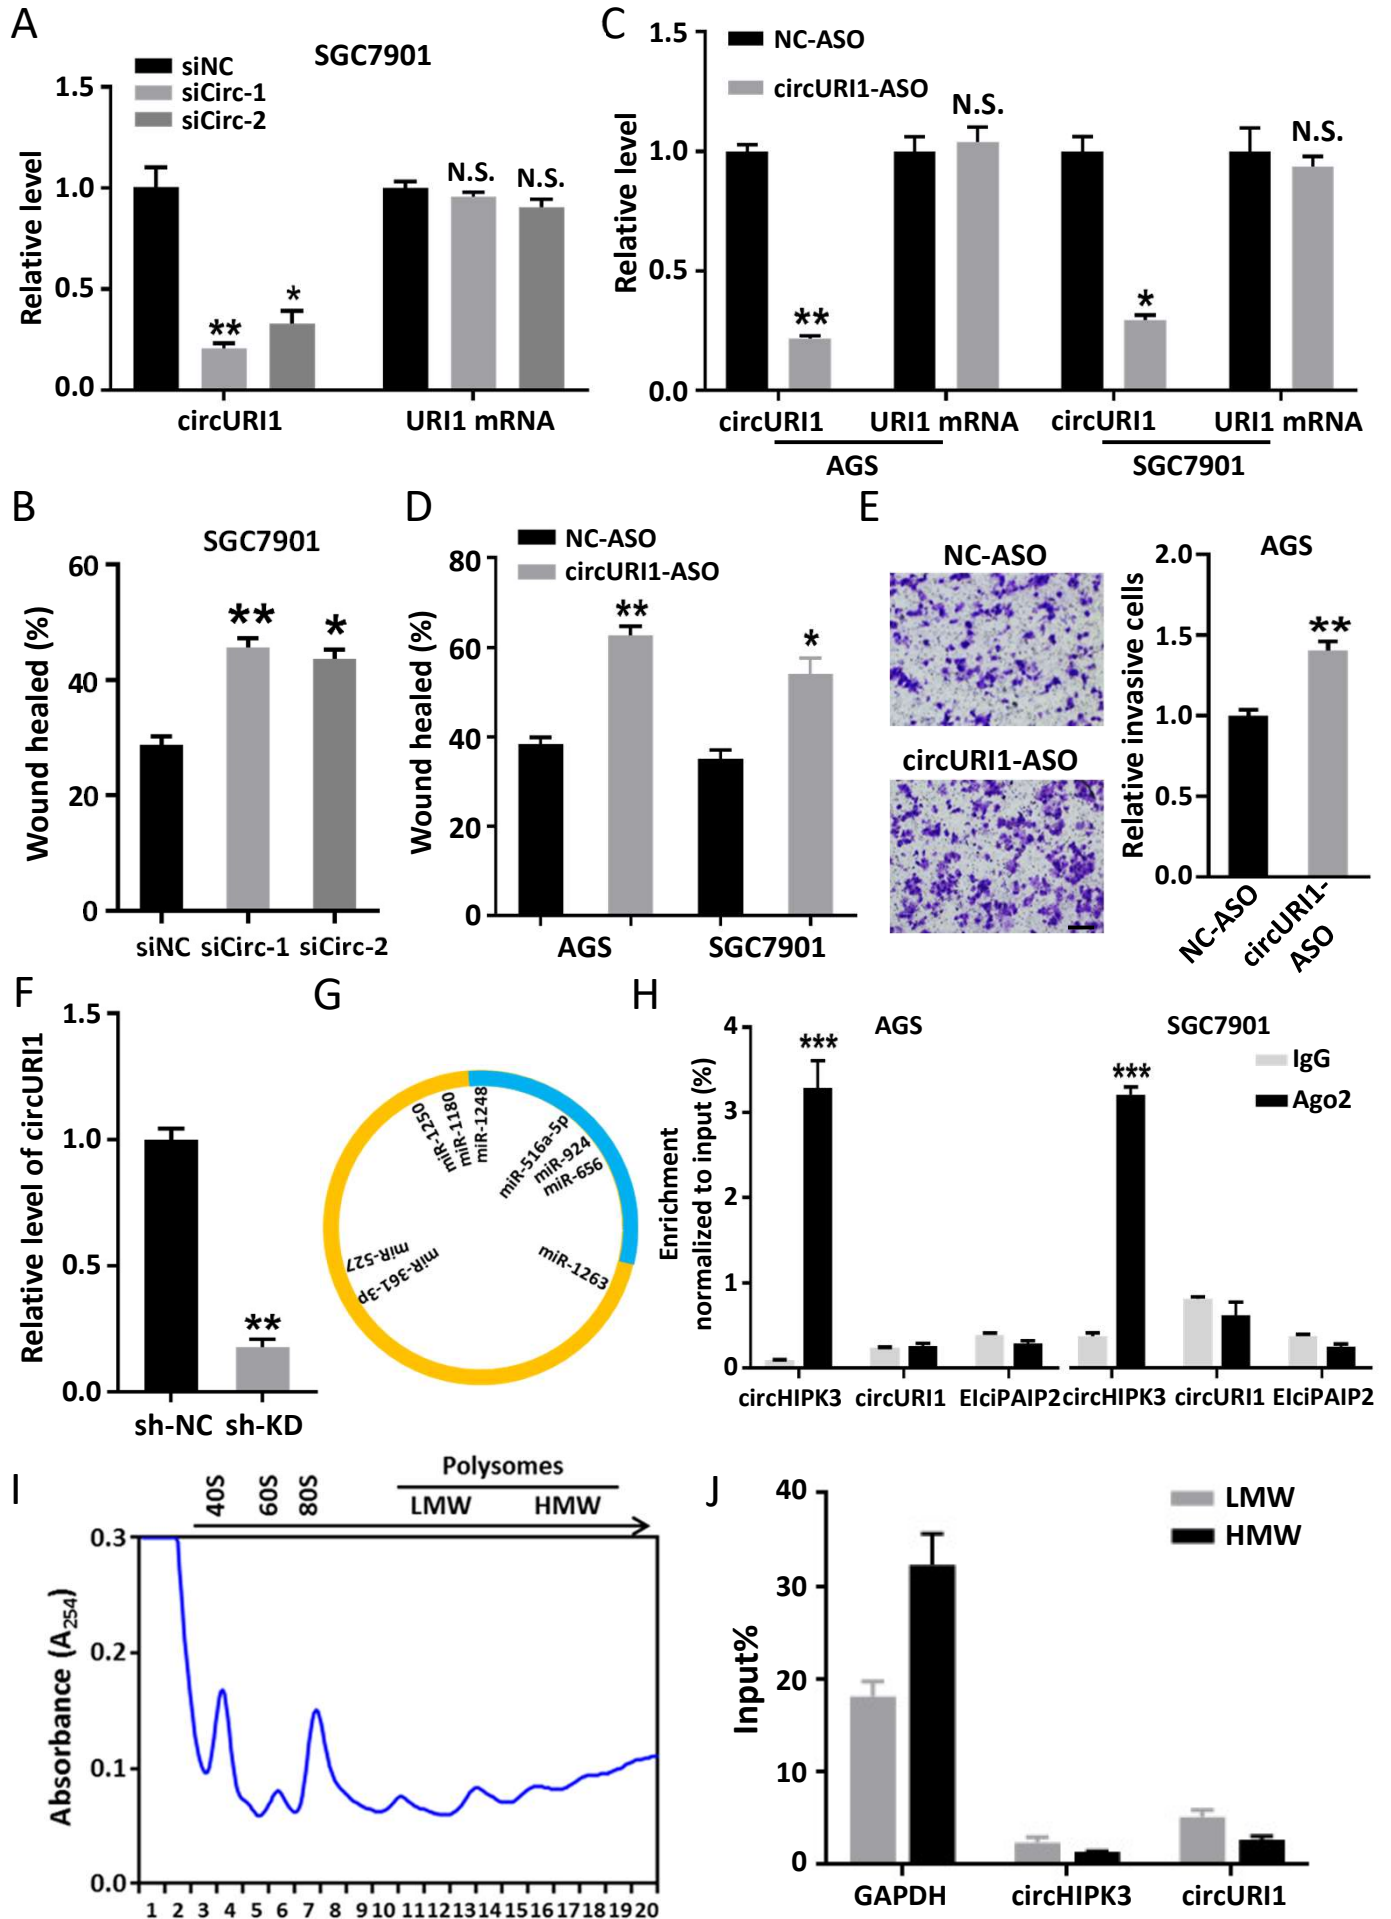

**Fig. S4.** Effects of *circURII* on cell migration and invasion, and *circURII* functions beyond miRNA sponge and translation. (A) RT-qPCR analysis of *circURII* and *URII* mRNA expression in SGC7901 cells treated with two independent siRNAs against *circURII*. siNC, siRNA with scrambled sequences; siCirc-1 and siCirc-2, two siRNAs against the junction sites of *circURII*. (B) Wound-healing assays of SGC7901 cells treated with siRNAs targeting *circURII*. (C) RT-qPCR analysis of *circURII* and *URII* mRNA expression in AGS and SGC7901 cells treated with ASO against *circURII*. NC-ASO, ASO with scrambled sequences. (D) Wound-healing assays of AGS and SGC7901 cells treated with ASO of *circURII*. (E) Transwell assays of AGS cells treated with ASO of *circURII*. Scale bars, 100  $\mu$ m. (F) Knockdown efficiency lentivirus-shRNA to knockdown *circURII* (sh-KD) in stable cell lines. sh-NC is the negative control for knockdown *circURII*. (G) Predicted putative binding miRNAs of *circURII* with CircInteractome. (H) Ago2 RNA IP assay for detection of *circURII* in AGS and SGC7901 cells. *CircHIPK3* acted as a miRNA sponge was a positive control, while *ElciPAIP2* was a negative control. (I) The curve of ribosome profiling. LMW, low molecular weight fraction; HMW, high molecular weight fraction. (J) RT-qPCR analysis of *circURII* in either LMW or HMW in AGS cells. *GAPDH* mRNA was a positive control, while *circHIPK3* was a negative control. Error bars, S.E.M. from three independent experiments. N.S., not significant; \*P< 0.05; \*\*P< 0.01; \*\*\*P< 0.001 by two-tailed Student's *t*-test.

Figure S5

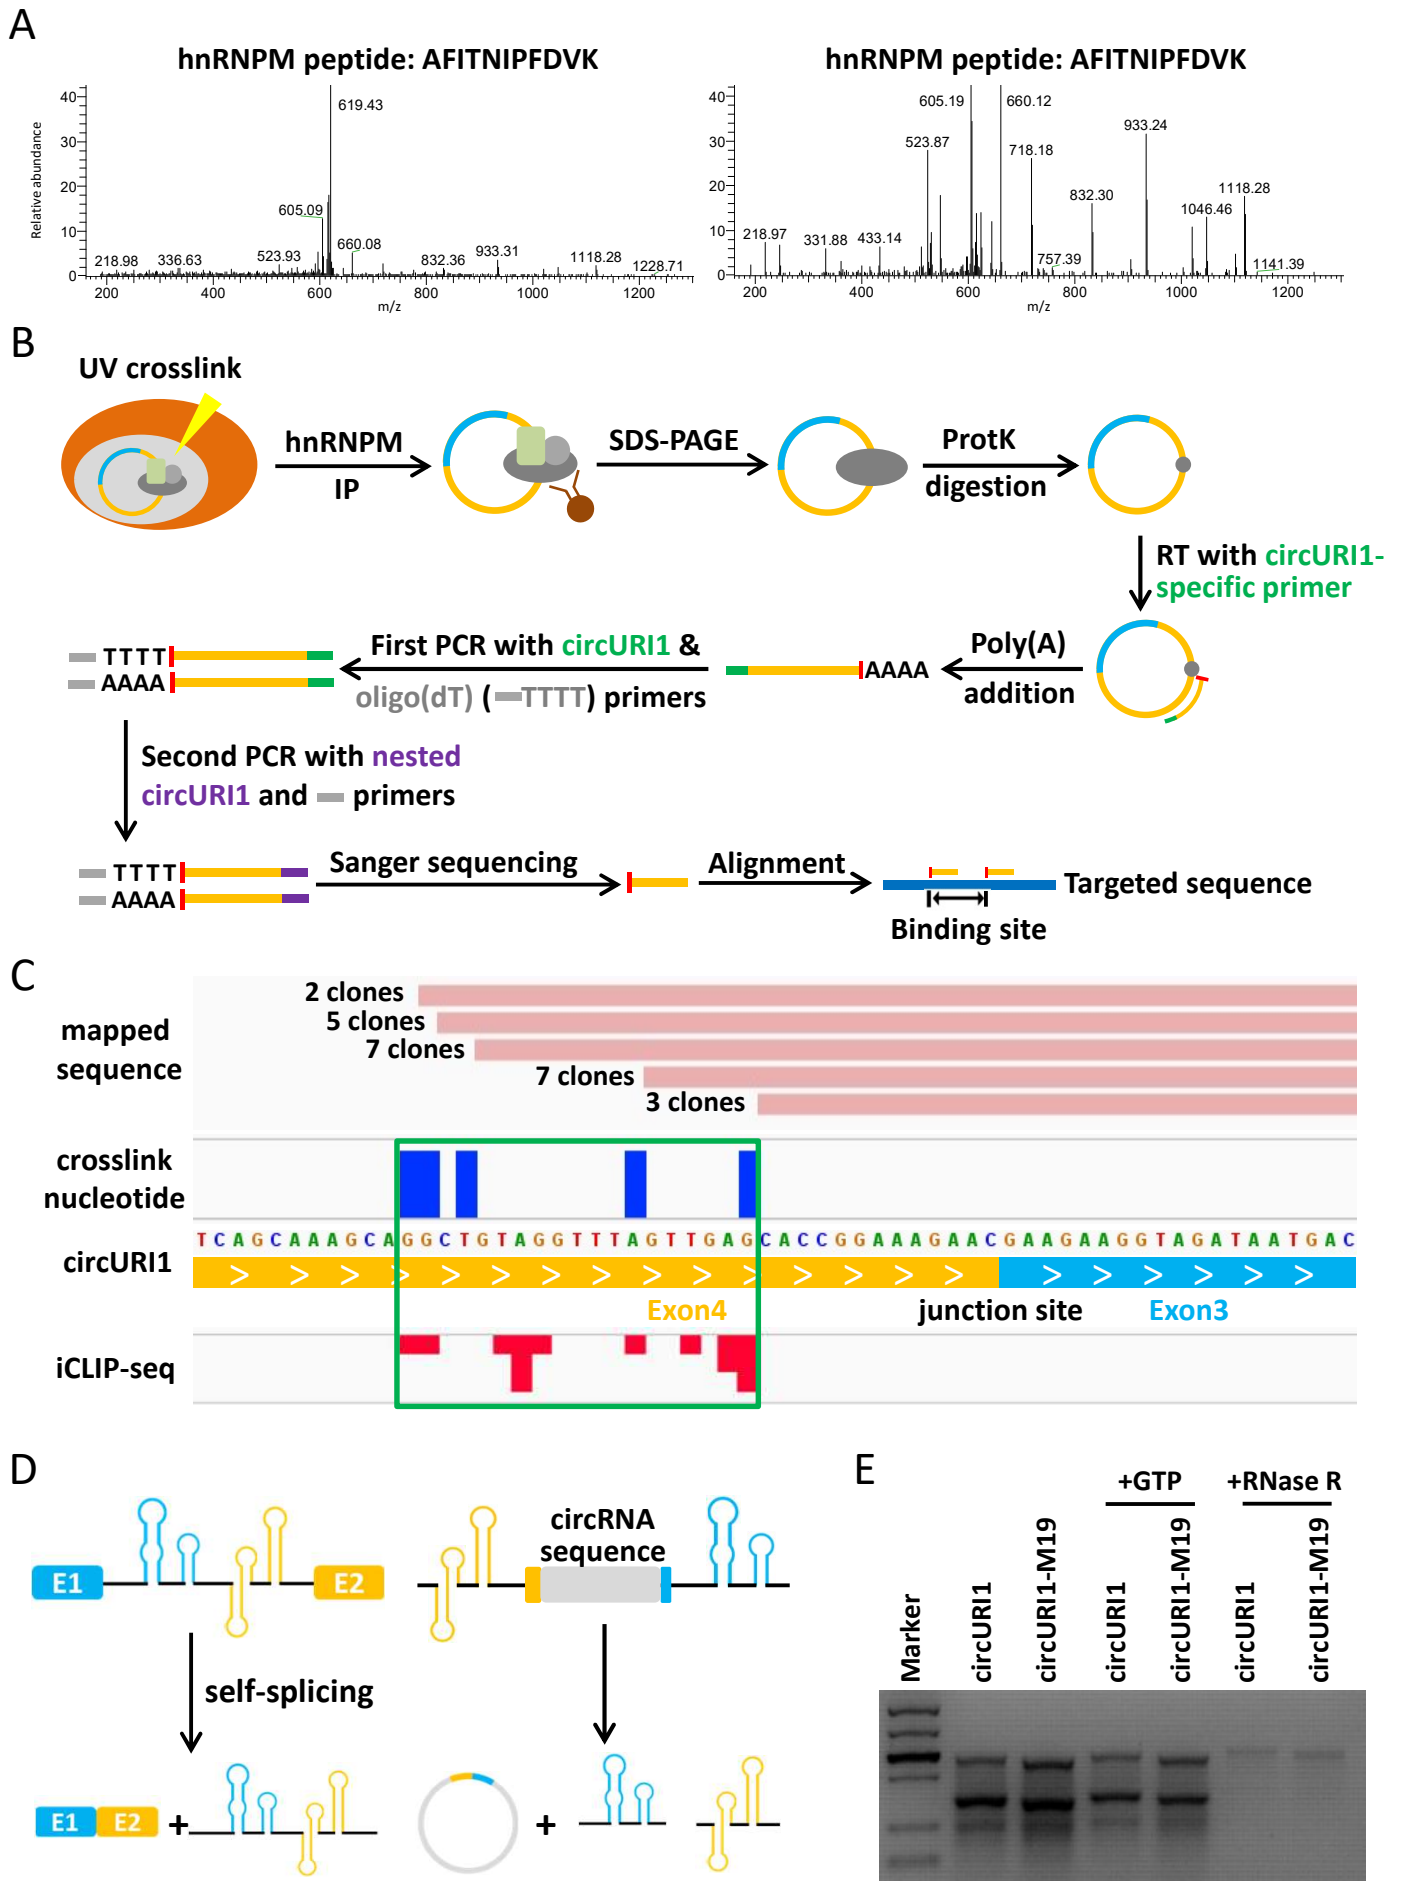

**Fig. S5.** Analysis of hnRNPM individual-CLIP and the circularization of *circURII* *in vitro*. (A) The identified peptides of hnRNPM from MS assay. (B) Scheme of individual-CLIP for the identification of hnRNPM binding site in *circURII*. Briefly, the covalently linked protein-RNA complexes were separated with SDS-PAGE and partially digested with proteinase K (ProtK), followed by co-immunoprecipitated with anti-hnRNPM after UV crosslinking. Incomplete ProtK digestion left the covalently bound polypeptide fragment on the RNA binding site of hnRNPM protein. Reverse transcription (RT) with a *circURII*-specific primer (in green) stopped at the cross-link site. Red bar, the RT-stop nucleotide. The synthesized cDNA molecules were polyadenylated at the 3' ends, used as templates for two successive rounds of PCR and subjected to Sanger sequencing. oligo(dT) primer, a specific sequence at the 5' and oligo(dT) at the 3' end. For analysis, only readings with poly(T) were mapped to the *circURII* sequence and the first nucleotide in the upstream of the sequence was defined as the crosslink nucleotide. (C) Five crosslink nucleotides of *circURII* were identified from 24 clones and the binding site of hnRNPM individual-CLIP in *circURII* is depicted as the green rectangle, consistent with the binding site identified by hnRNPM iCLIP-seq. (D) The principle of circularization *in vitro*. This method was based on self-spliced intron. (E) Agarose gel of synthesized *circURII* and *circURII-M19* *in vitro*. *CircURII-M19*, *circURII* with the mutation of the 19-nt sequence.

Figure S6

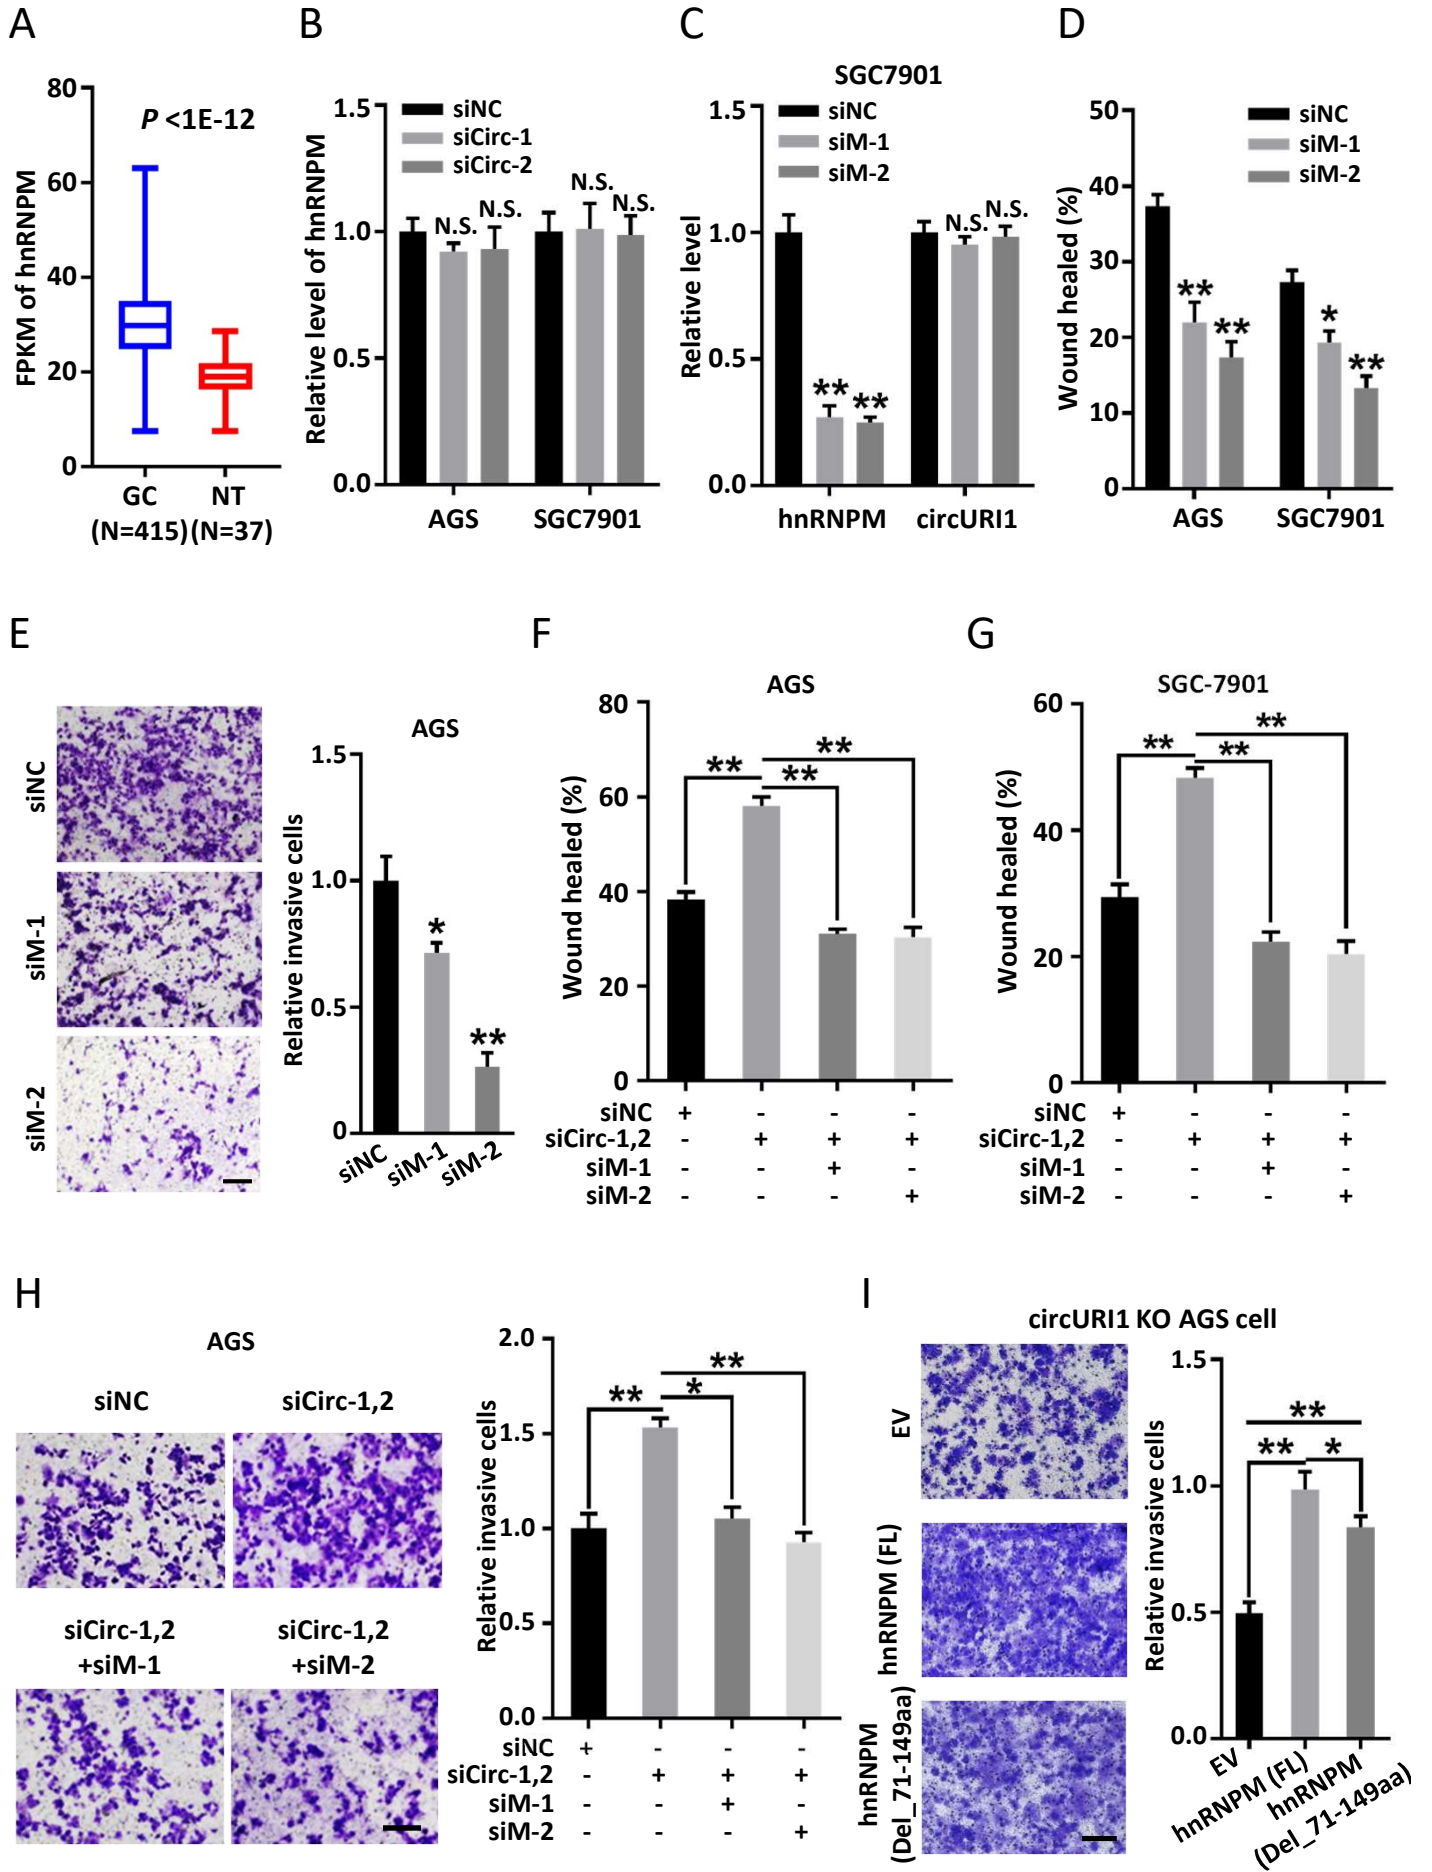



**Fig. S6.** Effects of hnRNPM on cell migration and invasion in GC. (A) The expression levels of hnRNPM analyzed from TCGA database in GC. NT, normal tissue. (B) RT-qPCR analysis of hnRNPM expression upon *circURII* silencing in AGS and SGC7901 cells. siNC, siRNA with scrambled sequences; siCirc-1 and siCirc-2, two siRNAs against the junction sites of *circURII*. (C) RT-qPCR analysis of hnRNPM and *circURII* expression after treatment with two independent siRNAs against hnRNPM in SGC7901 cells. siNC, siRNA with scrambled sequences; siM-1 and siM-2, two independent siRNAs against hnRNPM. (D) Wound-healing assays of AGS and SGC7901 cells upon hnRNPM knockdown. (E) Transwell assays of AGS cells treated with siRNAs targeting hnRNPM. Scale bars, 100  $\mu$ m. (F and G) Wound-healing assays of AGS and SGC7901 cells treated with siRNAs targeting *circURII* or co-transfected with siRNAs targeting hnRNPM. siNC, siRNA with scrambled sequences; siCirc-1,2, two siRNAs (siCirc-1, siCirc-2) against the junction sites of *circURII*. (H) Transwell assays of AGS cells treated with siRNAs targeting *circURII* or co-transfected with siRNAs targeting hnRNPM. Scale bars, 100  $\mu$ m. (I) Transwell assays of AGS *circURII* KO cells overexpressing hnRNPM truncated forms including full length hnRNPM (hnRNPM (FL)) and hnRNPM without the RRM1 domain (hnRNPM (Del\_71-149aa)). EV, empty vector. Scale bars, 100  $\mu$ m. Error bars, S.E.M. from three independent experiments. N.S., not significant; \*P< 0.05; \*\*P< 0.01 by two-tailed Student's *t*-test.

Figure S7

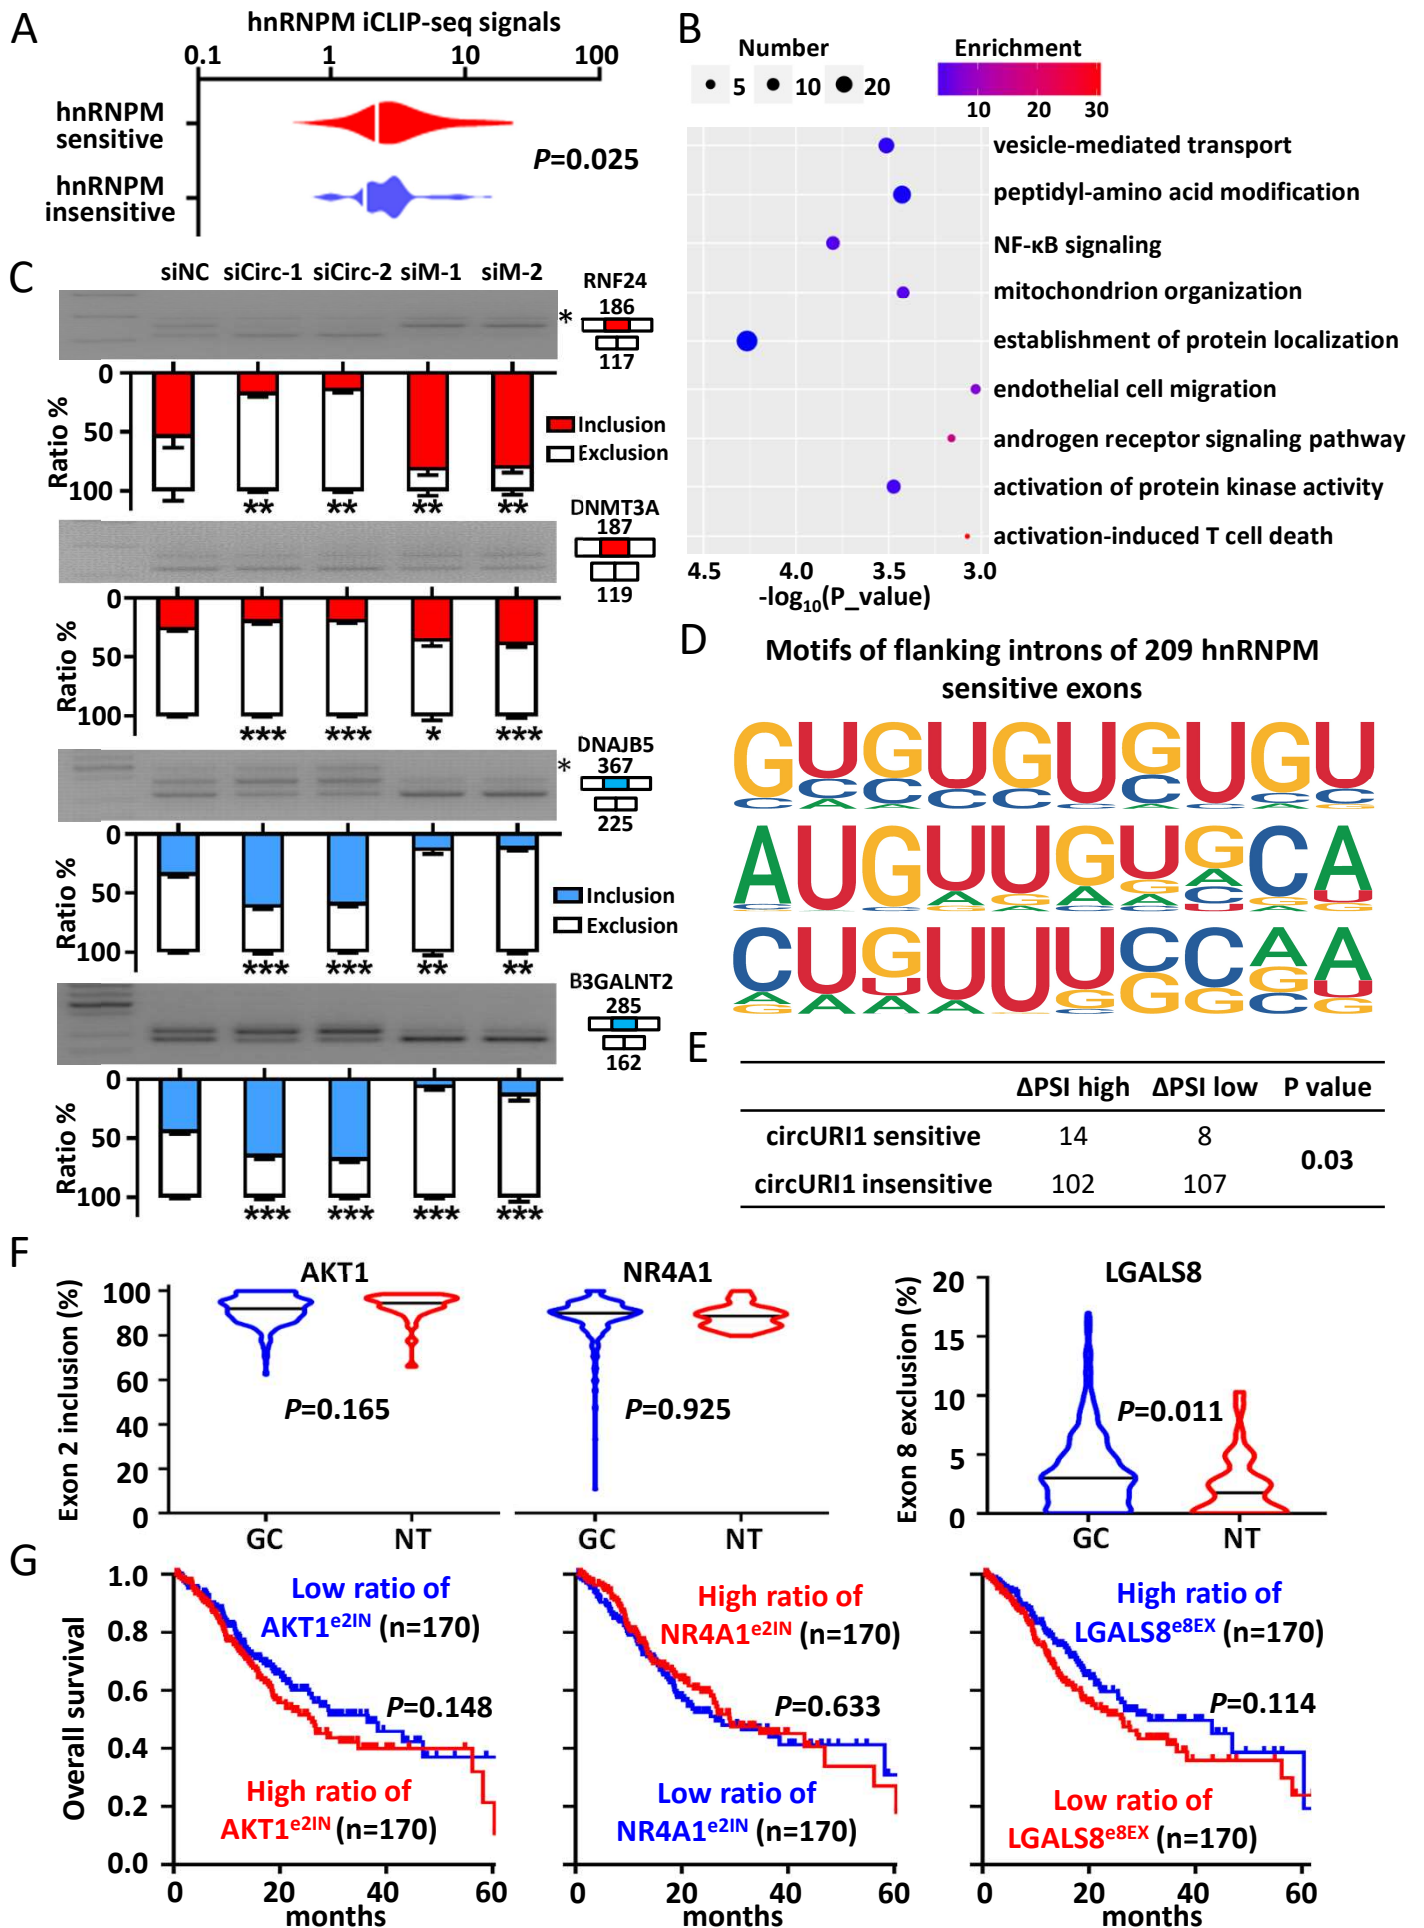

**Fig. S7.** Analysis of alternative splicing caused by hnRNPM loss in AGS cells and TCGA analysis of alternative splicing. (A) Violin plots showing hnRNPM iCLIP-seq signals in the flanking introns of the hnRNPM sensitive and insensitive exons. (B) Gene ontology analysis of 231 hnRNPM sensitive targets analyzed by Gorilla. (C) Semi-quantitative RT-PCR gels. For RNF24 and DNAJB5, unspecific bands are also amplified (indicated with a star). siNC, siRNA with scrambled sequences; siCirc-1 and siCirc-2, two siRNAs against the junction sites of *circURII*; siM-1 and siM-2, two independent siRNAs against hnRNPM. \*P<0.05; \*\*P<0.01; \*\*\*P<0.001 by two-tailed Student's *t*-test. (D) The enriched motifs of introns flanked by 209 hnRNPM sensitive exons analyzed by HOMER (-len 10). (E) Distribution of the changes for 22 *circURII*-sensitive exons in 231 hnRNPM-sensitive exons. The changes of PSI ( $\Delta$ PSI) for all exons sensitive to hnRNPM are arranged from high to low.  $\Delta$ PSI high, the top 50% exons;  $\Delta$ PSI low, the bottom 50% exons. P value was calculated by Chi-square test. (F) Violin plots depicting the ratios of *AKT1*<sup>e2IN</sup>, *NR4A1*<sup>e2IN</sup> and *LGALS8*<sup>e8EX</sup> in GC patients and controls analyzed from TCGA database. NT, normal tissue. *AKT1*<sup>e2IN</sup>, exon 2 inclusion of AKT1; *NR4A1*<sup>e2IN</sup>, exon 2 inclusion of NR4A1; *LGALS8*<sup>e8EX</sup>, exon 8 exclusion of LGALS8. P values were calculated by two-tailed Student's *t*-test. (G) Kaplan-Meier analysis of overall survival for GC patients with *AKT1*<sup>e2IN</sup>, *NR4A1*<sup>e2IN</sup> and *LGALS8*<sup>e8EX</sup>. P value was calculated by log-rank test. Error bars, S.E.M. from three independent experiments.

**Table S1. Differentially expressed circRNAs in GC.**

| #chrom | Start     | Stop      | Strand | Log2FC(GC/paraGC) | P value     |
|--------|-----------|-----------|--------|-------------------|-------------|
| chr7   | 134222331 | 134260679 | +      | 8.76              | 0.008644453 |
| chr22  | 22681864  | 22764194  | +      | 8.66              | 0.04300031  |
| chr7   | 134216659 | 134253077 | +      | 7.26              | 0.015298981 |
| chr1   | 1572769   | 1635783   | -      | 6.99              | 2.35E-06    |
| chr4   | 100205555 | 100264212 | -      | 6.77              | 0.020609079 |
| chr14  | 106109959 | 106208132 | -      | 6.2               | 0.026791931 |
| chr19  | 42265156  | 42301880  | +      | 6.18              | 0.000902785 |
| chr21  | 34804483  | 34805178  | +      | 6.07              | 0.000275168 |
| chr10  | 124348459 | 124358613 | +      | 6.02              | 0.037791341 |
| chr7   | 48541721  | 48542148  | +      | 5.89              | 0.04073598  |
| chr1   | 89523674  | 89579979  | -      | 5.83              | 0.005214303 |
| chr9   | 90343499  | 90388160  | +      | 5.78              | 0.000486664 |
| chr12  | 49491348  | 49491888  | -      | 5.34              | 0.019235087 |
| chr6   | 26368792  | 26443670  | +      | 5.25              | 0.014067792 |
| chr1   | 155182175 | 155202636 | +      | 5.17              | 0.015602036 |
| chr5   | 137288316 | 137290065 | -      | 5.15              | 0.004011448 |
| chr9   | 115013208 | 115060196 | -      | 5.08              | 0.026928525 |
| chr1   | 111690263 | 111703918 | +      | 4.94              | 0.024339698 |
| chr1   | 232649602 | 232669329 | -      | 4.91              | 0.034285789 |
| chr13  | 21305979  | 21306260  | -      | 4.86              | 0.009601477 |
| chr16  | 53907697  | 53922863  | +      | 4.86              | 0.026700685 |
| chr14  | 35331249  | 35331528  | -      | 4.85              | 0.039222862 |
| chr1   | 151089867 | 151090615 | +      | 4.84              | 0.039439288 |
| chrX   | 134679347 | 134690225 | +      | 4.78              | 0.014821815 |
| chr17  | 60111147  | 60112969  | -      | 4.77              | 0.024162691 |
| chr17  | 27778472  | 27778698  | +      | 4.76              | 0.022544179 |
| chr1   | 231506307 | 231509845 | -      | 4.75              | 0.029688738 |
| chr2   | 230723487 | 230744844 | -      | 4.73              | 0.028832165 |
| chrX   | 77270158  | 77275895  | +      | 4.68              | 0.034255988 |
| chr9   | 134305476 | 134308181 | +      | 4.64              | 0.007747359 |
| chr2   | 32735592  | 32738221  | +      | 4.64              | 0.027119487 |
| chr13  | 41892941  | 41910892  | +      | 4.55              | 0.026208224 |
| chr3   | 196118683 | 196129890 | -      | 4.54              | 0.037515345 |
| chr16  | 83940591  | 83945972  | +      | 4.52              | 0.010434323 |
| chr4   | 39915230  | 39927553  | -      | 4.52              | 0.0357726   |
| chr3   | 179131199 | 179137293 | -      | 4.51              | 0.011460949 |
| chr2   | 15601324  | 15651474  | -      | 4.51              | 0.011461935 |
| chr12  | 133357383 | 133359079 | -      | 4.49              | 0.034386269 |
| chr16  | 24043456  | 24046868  | +      | 4.49              | 0.041045313 |
| chr1   | 21327691  | 21329301  | -      | 4.49              | 0.041051858 |
| chr4   | 106832305 | 106832889 | +      | 4.4               | 0.042577566 |
| chr7   | 133821775 | 133848292 | +      | 4.38              | 0.047566238 |
| chr2   | 200233327 | 200298237 | -      | 4.37              | 0.019693797 |
| chr19  | 50902107  | 50902741  | +      | 4.36              | 0.038019195 |

|       |           |           |   |      |             |
|-------|-----------|-----------|---|------|-------------|
| chr10 | 111883774 | 111890244 | + | 4.35 | 0.039974013 |
| chr8  | 124089350 | 124096580 | + | 4.35 | 0.045048164 |
| chr1  | 1423242   | 1459777   | + | 4.23 | 0.049071767 |
| chr1  | 104108056 | 104152972 | + | 4.22 | 0.02497363  |
| chr1  | 161479609 | 161559609 | + | 4.21 | 0.000634754 |
| chr19 | 55175636  | 55208843  | + | 4.21 | 0.028824637 |
| chr2  | 191765289 | 191789319 | + | 4.21 | 0.030688108 |
| chr4  | 169812072 | 169837178 | + | 4.2  | 0.047194124 |
| chr2  | 69575302  | 69590802  | - | 4.2  | 0.04904088  |
| chr12 | 66597490  | 66622150  | + | 4.1  | 0.012003239 |
| chr10 | 124340381 | 124358613 | + | 4.06 | 0.001710737 |
| chr14 | 91947919  | 91952074  | - | 4.04 | 0.033921106 |
| chr1  | 155896466 | 155896947 | - | 4.04 | 0.039752065 |
| chr7  | 43679047  | 43680248  | - | 4.03 | 0.009442163 |
| chr15 | 101775286 | 101775782 | - | 3.91 | 0.003961356 |
| chr10 | 31661946  | 31750166  | + | 3.7  | 0.00165616  |
| chr8  | 128902834 | 128903244 | + | 3.7  | 0.014794205 |
| chr6  | 144858717 | 144864006 | + | 3.66 | 0.008606594 |
| chr3  | 197541778 | 197547301 | + | 3.66 | 0.027262821 |
| chr1  | 161480623 | 161561188 | + | 3.6  | 0.025322291 |
| chr15 | 67524151  | 67529158  | - | 3.58 | 0.016705296 |
| chr8  | 99718694  | 99719539  | - | 3.37 | 0.02642291  |
| chr16 | 31392217  | 31435524  | + | 3.36 | 0.005586221 |
| chr9  | 128419929 | 128434922 | - | 3.35 | 0.041855082 |
| chr12 | 10561987  | 10588009  | - | 3.3  | 0.049571796 |
| chr1  | 65243305  | 65255197  | + | 3.29 | 0.049844037 |
| chr15 | 44907560  | 44912601  | - | 3.26 | 0.047609224 |
| chr19 | 45419446  | 45430290  | + | 3.23 | 0.000447381 |
| chr1  | 145323653 | 145327665 | + | 3    | 0.044750977 |
| chr9  | 4286037   | 4286523   | - | 2.91 | 0.031438846 |
| chr11 | 108098321 | 108100050 | + | 2.87 | 0.023294112 |
| chr10 | 34558584  | 34573173  | - | 2.68 | 0.034256054 |
| chr4  | 128842678 | 128861152 | - | 2.61 | 0.043051776 |
| chr1  | 196682864 | 196749103 | + | 2.56 | 0.009852882 |
| chr19 | 30476129  | 30477324  | + | 2.55 | 0.0224366   |
| chr9  | 90343164  | 90387913  | + | 2.23 | 0.000287188 |
| chr12 | 9251976   | 9333728   | - | 2.22 | 0.00175949  |
| chr1  | 89477429  | 89521911  | - | 2.18 | 0.036733544 |
| chr1  | 31465236  | 31468067  | - | 2.12 | 0.039056807 |
| chr11 | 104901056 | 104936972 | - | 2.08 | 0.002060441 |
| chr16 | 18852886  | 18856973  | - | 1.99 | 0.037903909 |
| chr5  | 176370335 | 176385155 | - | 1.88 | 0.037771319 |
| chr12 | 9268359   | 9356547   | - | 1.8  | 0.001214883 |
| chr7  | 35942685  | 36006136  | + | 1.78 | 0.034711244 |
| chr12 | 94562928  | 94580249  | + | 1.68 | 0.029732262 |
| chr2  | 40655612  | 40657444  | - | 1.39 | 0.001123669 |

|       |           |           |   |       |             |
|-------|-----------|-----------|---|-------|-------------|
| chr12 | 49525080  | 49580616  | - | 1.27  | 0.013939526 |
| chr12 | 9246060   | 9317963   | - | 1.25  | 0.022238707 |
| chr15 | 43873424  | 43973156  | - | 1.02  | 0.005182414 |
| chr6  | 7176887   | 7189555   | + | -1.21 | 0.034518945 |
| chr3  | 171965322 | 171969331 | + | -1.22 | 0.009089271 |
| chr6  | 158703294 | 158735300 | + | -1.31 | 0.034002904 |
| chr12 | 32751430  | 32764217  | + | -1.53 | 0.001750767 |
| chr2  | 227729319 | 227779067 | + | -1.63 | 0.006300266 |
| chr5  | 145176004 | 145205763 | - | -1.66 | 0.028043138 |
| chr17 | 20107645  | 20109225  | + | -1.72 | 0.003113621 |
| chr16 | 56660791  | 56717142  | + | -1.82 | 0.024427608 |
| chr16 | 56643174  | 56717142  | + | -1.9  | 0.003699757 |
| chr16 | 85667519  | 85667738  | + | -1.93 | 0.002845673 |
| chr6  | 158733082 | 158735300 | + | -1.98 | 0.000566279 |
| chr16 | 56643174  | 56673241  | + | -1.99 | 0.000161069 |
| chr4  | 37633006  | 37640126  | - | -2.02 | 0.03358793  |
| chr16 | 56660791  | 56667317  | + | -2.02 | 0.04582683  |
| chr2  | 233651863 | 233660935 | + | -2.14 | 0.03276043  |
| chr6  | 161455290 | 161471011 | + | -2.16 | 0.028745588 |
| chr16 | 56660791  | 56692652  | + | -2.25 | 0.006246202 |
| chr3  | 169694733 | 169706147 | + | -2.3  | 0.011898539 |
| chr1  | 59787207  | 59812070  | + | -2.39 | 0.031065243 |
| chr4  | 187627716 | 187630999 | - | -2.51 | 0.003094547 |
| chr15 | 100871093 | 100874385 | - | -2.51 | 0.032270326 |
| chr16 | 56660791  | 56704483  | + | -2.56 | 0.035548444 |
| chr16 | 56660791  | 56670416  | + | -2.59 | 0.0089101   |
| chr7  | 97820039  | 97823884  | + | -2.63 | 0.010846862 |
| chr1  | 95609446  | 95616975  | + | -2.66 | 0.04273992  |
| chr1  | 19595065  | 19609386  | - | -2.68 | 0.005822795 |
| chr16 | 56660791  | 56673241  | + | -2.71 | 0.000206145 |
| chr6  | 52657653  | 52712830  | - | -2.71 | 0.020628369 |
| chr17 | 18110128  | 18111689  | + | -2.76 | 0.037936617 |
| chr2  | 63206322  | 63223901  | + | -2.79 | 0.004689665 |
| chr13 | 33109905  | 33111164  | - | -2.8  | 0.007661046 |
| chr1  | 19612381  | 19633904  | - | -2.86 | 0.005962385 |
| chr3  | 169831147 | 169840532 | - | -2.87 | 0.04740725  |
| chr10 | 12123470  | 12162266  | + | -2.87 | 0.04877325  |
| chr3  | 3819408   | 3830758   | - | -2.89 | 0.00949252  |
| chrX  | 24190831  | 24197887  | + | -2.89 | 0.01518267  |
| chr1  | 213290658 | 213303232 | + | -2.95 | 0.043058649 |
| chr12 | 12672795  | 12674397  | - | -2.96 | 0.001919718 |
| chr4  | 108603170 | 108622441 | - | -2.96 | 0.014927722 |
| chr20 | 47570092  | 47580435  | + | -3.01 | 0.036663069 |
| chr18 | 42529845  | 42533305  | + | -3.03 | 0.003704764 |
| chr16 | 11114049  | 11154879  | + | -3.05 | 0.006216082 |
| chr4  | 40596274  | 40598817  | - | -3.06 | 0.030915288 |

|       |           |           |   |       |             |
|-------|-----------|-----------|---|-------|-------------|
| chr12 | 32729199  | 32764217  | + | -3.11 | 0.002993519 |
| chr12 | 32734893  | 32764217  | + | -3.14 | 0.025521296 |
| chr2  | 223765391 | 223773868 | + | -3.18 | 0.010886125 |
| chr5  | 132426884 | 132428481 | + | -3.35 | 0.009632904 |
| chr15 | 57730182  | 57734676  | + | -3.35 | 0.020750542 |
| chr1  | 59787207  | 59844509  | + | -3.36 | 0.048897712 |
| chr3  | 71064699  | 71102924  | - | -3.41 | 0.030287317 |
| chr7  | 151900018 | 151904513 | - | -3.58 | 0.048601931 |
| chr16 | 30490411  | 30490782  | + | -3.65 | 0.032343127 |
| chr6  | 73005639  | 73043538  | + | -3.72 | 0.001859961 |
| chr2  | 120885263 | 120932580 | + | -3.74 | 0.000330623 |
| chr2  | 183993014 | 183995273 | + | -3.87 | 0.027617684 |
| chr4  | 140810510 | 140812121 | - | -3.96 | 0.009947137 |
| chr16 | 56643174  | 56660443  | + | -4.03 | 0.001376818 |
| chr6  | 35586872  | 35614627  | - | -4.07 | 0.010622024 |
| chr4  | 40892380  | 40937156  | - | -4.13 | 0.04391518  |
| chr5  | 123974825 | 124036962 | - | -4.14 | 0.031438754 |
| chr2  | 170487283 | 170488443 | + | -4.16 | 0.046354645 |
| chr14 | 67431907  | 67525503  | + | -4.16 | 0.046357118 |
| chr1  | 95609446  | 95639445  | + | -4.16 | 0.046359591 |
| chr5  | 127474288 | 127488497 | + | -4.17 | 0.003779461 |
| chr7  | 102453723 | 102462650 | - | -4.25 | 0.029638    |
| chr1  | 118035768 | 118045592 | + | -4.26 | 0.048137215 |
| chr15 | 66021409  | 66048810  | - | -4.26 | 0.048140666 |
| chr5  | 112327850 | 112339774 | + | -4.26 | 0.048144117 |
| chr2  | 113057425 | 113089859 | + | -4.27 | 0.000321254 |
| chr2  | 27822449  | 27824309  | + | -4.27 | 0.022525463 |
| chr14 | 71209067  | 71209308  | - | -4.28 | 0.024112161 |
| chr16 | 57238415  | 57250947  | + | -4.28 | 0.02411516  |
| chr14 | 95056377  | 95081421  | + | -4.29 | 0.036048221 |
| chr2  | 173423435 | 173435552 | + | -4.38 | 0.025166377 |
| chr20 | 18278628  | 18287037  | + | -4.39 | 0.018199893 |
| chr1  | 14057494  | 14075982  | + | -4.39 | 0.041182107 |
| chr19 | 57706136  | 57755417  | + | -4.39 | 0.041185221 |
| chr16 | 16101672  | 16150152  | + | -4.41 | 0.041279032 |
| chr4  | 103610730 | 103651893 | - | -4.41 | 0.04128217  |
| chr17 | 65906992  | 65909303  | + | -4.44 | 0.041189245 |
| chr8  | 94798450  | 94828743  | + | -4.44 | 0.0430133   |
| chr5  | 145044816 | 145083858 | - | -4.48 | 0.045976523 |
| chr2  | 73761950  | 73800551  | + | -4.51 | 0.01235442  |
| chr10 | 1118055   | 1151207   | + | -4.52 | 0.032652927 |
| chr10 | 88212976  | 88220253  | - | -4.54 | 0.039422549 |
| chr17 | 29483000  | 29497015  | + | -4.56 | 0.032714133 |
| chr2  | 214174782 | 214215369 | + | -4.56 | 0.032716628 |
| chr4  | 2659529   | 2661781   | + | -4.56 | 0.03673529  |
| chr10 | 75142932  | 75143448  | - | -4.56 | 0.038131621 |

|       |           |           |   |       |             |
|-------|-----------|-----------|---|-------|-------------|
| chr6  | 158922709 | 158925210 | + | -4.56 | 0.048224519 |
| chr2  | 165548730 | 165552343 | - | -4.56 | 0.048229556 |
| chr5  | 139574030 | 139574237 | + | -4.62 | 0.027169074 |
| chr1  | 213037066 | 213061936 | + | -4.64 | 0.029640687 |
| chr1  | 235950499 | 235964397 | - | -4.66 | 0.044543821 |
| chr12 | 32729199  | 32778713  | + | -4.66 | 0.044550643 |
| chr19 | 12503416  | 12542794  | - | -4.66 | 0.044557468 |
| chr9  | 33953282  | 33956144  | - | -4.66 | 0.044564295 |
| chr1  | 180953812 | 180974599 | - | -4.67 | 0.029243026 |
| chr3  | 17549965  | 17628049  | - | -4.67 | 0.029244653 |
| chr11 | 67934448  | 67957619  | - | -4.67 | 0.042893384 |
| chr8  | 124089350 | 124117704 | + | -4.68 | 0.043863151 |
| chr17 | 11984672  | 11999011  | + | -4.68 | 0.043871105 |
| chr2  | 205521864 | 205551005 | + | -4.72 | 0.023560349 |
| chr18 | 77488906  | 77496521  | + | -4.72 | 0.023565649 |
| chr17 | 74287095  | 74290102  | - | -4.72 | 0.02357095  |
| chr9  | 111819470 | 111826847 | - | -4.75 | 0.00497201  |
| chr6  | 134349518 | 134350859 | - | -4.75 | 0.00600937  |
| chr2  | 15415607  | 15417225  | - | -4.75 | 0.030342735 |
| chr1  | 203680004 | 203691817 | + | -4.75 | 0.030349078 |
| chr3  | 111828389 | 111831992 | + | -4.77 | 0.024197941 |
| chr6  | 111493897 | 111527938 | + | -4.78 | 0.039775568 |
| chr12 | 18715636  | 18719991  | + | -4.82 | 0.005721344 |
| chr1  | 215342541 | 215345526 | + | -4.83 | 0.004253443 |
| chr8  | 73117533  | 73123790  | - | -4.84 | 0.022957082 |
| chr7  | 141759655 | 141785761 | + | -4.84 | 0.022962645 |
| chr14 | 74360499  | 74370813  | + | -4.84 | 0.02297377  |
| chr15 | 73408880  | 73428368  | + | -4.85 | 0.006815048 |
| chr11 | 60971980  | 61009403  | + | -4.86 | 0.01132546  |
| chr3  | 47777523  | 47814426  | - | -4.86 | 0.035841824 |
| chr1  | 236966727 | 236969533 | + | -4.87 | 0.022225199 |
| chr1  | 76205664  | 76216231  | + | -4.87 | 0.02223067  |
| chr1  | 52237741  | 52238395  | + | -4.87 | 0.022236141 |
| chr9  | 79115831  | 79142811  | + | -4.9  | 0.021894332 |
| chr1  | 32502510  | 32504220  | + | -4.94 | 0.024145546 |
| chr8  | 17541836  | 17613470  | - | -4.96 | 0.019609646 |
| chr12 | 18434937  | 18478032  | + | -4.96 | 0.019613134 |
| chr22 | 39438941  | 39473383  | + | -4.99 | 0.017523254 |
| chr10 | 90427043  | 90433491  | + | -5.03 | 0.010244453 |
| chr3  | 183361267 | 183382827 | + | -5.05 | 0.007263108 |
| chr2  | 48065997  | 48066908  | - | -5.08 | 0.015442617 |
| chr4  | 187584452 | 187630999 | - | -5.09 | 0.001281834 |
| chr20 | 32996456  | 33001685  | + | -5.1  | 0.014985992 |
| chr14 | 31596990  | 31641328  | - | -5.11 | 0.002436026 |
| chr4  | 2951660   | 2955372   | - | -5.11 | 0.002620583 |
| chr3  | 185316199 | 185331196 | + | -5.14 | 0.014384253 |



|       |           |           |   |       |             |
|-------|-----------|-----------|---|-------|-------------|
| chr15 | 41961025  | 41991357  | + | -5.27 | 0.011963139 |
| chr14 | 38218143  | 38266152  | + | -5.27 | 0.011967449 |
| chr8  | 61707544  | 61714152  | + | -5.31 | 0.000806553 |
| chr1  | 16358204  | 16378906  | + | -5.35 | 0.011523233 |
| chr2  | 175324605 | 175346715 | - | -5.51 | 0.001197123 |
| chr15 | 57743697  | 57754090  | + | -5.6  | 0.000195385 |
| chr11 | 60971980  | 60990577  | + | -5.63 | 0.001162448 |
| chr18 | 51686134  | 51731527  | - | -5.64 | 0.001851611 |
| chr16 | 29916172  | 29917280  | + | -5.69 | 0.004217829 |
| chr15 | 45777354  | 45778619  | - | -5.75 | 0.038474549 |
| chr4  | 37633006  | 37636745  | - | -5.81 | 0.005726359 |
| chr15 | 57730182  | 57754090  | + | -5.83 | 0.000208886 |
| chr15 | 73995112  | 73996338  | + | -6.02 | 0.032042203 |
| chr7  | 91924202  | 91981956  | + | -6.19 | 0.004170394 |
| chr2  | 120885263 | 120932576 | + | -6.38 | 0.005896768 |
| chr11 | 60974814  | 60993643  | - | -6.58 | 0.002569343 |
| chr14 | 106208229 | 106235896 | - | -9.16 | 0.049547775 |

---

**FC=Fold Change. P values were generated by DEseq2.**

**Table S2.****The binding sites of hnRNPM iCLIP-seq**

| #chrom         | start     | stop      | strand | signals |
|----------------|-----------|-----------|--------|---------|
| chr1           | 28833872  | 28833931  | +      | 39      |
| chrM           | 1858      | 1875      | +      | 35      |
| chrM           | 2222      | 2276      | +      | 33      |
| chr1           | 109642920 | 109642955 | +      | 28      |
| chr13          | 45911662  | 45911706  | -      | 25      |
| chrM           | 3071      | 3115      | +      | 19      |
| chr15          | 25274053  | 25274068  | +      | 17      |
| chrUn_gl000220 | 118160    | 118204    | +      | 16      |
| chr1           | 28835090  | 28835122  | +      | 15      |
| chr11          | 62620423  | 62620462  | -      | 15      |
| chr11          | 93464201  | 93464241  | -      | 15      |
| chrM           | 3133      | 3143      | +      | 15      |
| chr19          | 30477292  | 30477311  | +      | 14      |
| chr1           | 28835148  | 28835177  | +      | 14      |
| chr3           | 186505100 | 186505135 | +      | 14      |
| chr9           | 35657822  | 35657852  | -      | 14      |
| chr3           | 39449877  | 39449892  | +      | 13      |
| chr1           | 28833952  | 28833986  | +      | 12      |
| chr3           | 39452586  | 39452608  | +      | 12      |
| chr1           | 93306301  | 93306320  | +      | 11      |
| chrM           | 729       | 734       | +      | 11      |
| chr1           | 93306272  | 93306276  | +      | 10      |
| chr3           | 186739528 | 186739536 | +      | 10      |
| chr6           | 15275372  | 15275394  | +      | 10      |
| chr9           | 130210845 | 130210861 | -      | 10      |
| chr11          | 62310632  | 62310640  | -      | 9       |
| chr11          | 65271948  | 65271977  | +      | 9       |
| chr11          | 68255702  | 68255706  | +      | 9       |
| chr15          | 25232318  | 25232340  | +      | 9       |
| chr15          | 25251200  | 25251208  | +      | 9       |
| chr15          | 25295317  | 25295321  | +      | 9       |
| chr15          | 25311811  | 25311828  | +      | 9       |
| chr15          | 57229961  | 57229977  | +      | 9       |
| chr17          | 7478027   | 7478045   | +      | 9       |
| chr3           | 186505432 | 186505439 | +      | 9       |
| chr6           | 8086732   | 8086741   | -      | 9       |
| chr6           | 133138382 | 133138386 | +      | 9       |
| chr7           | 6415333   | 6415337   | +      | 9       |
| chrM           | 2042      | 2050      | +      | 9       |
| chrM           | 2351      | 2356      | +      | 9       |

|                |           |           |   |   |
|----------------|-----------|-----------|---|---|
| chrUn_gl000220 | 117875    | 117881    | + | 9 |
| chr11          | 65192876  | 65192890  | + | 8 |
| chr11          | 65269041  | 65269049  | + | 8 |
| chr11          | 65272234  | 65272251  | + | 8 |
| chr15          | 25232250  | 25232256  | + | 8 |
| chr15          | 25294821  | 25294825  | + | 8 |
| chr15          | 25311054  | 25311061  | + | 8 |
| chr17          | 37009171  | 37009188  | - | 8 |
| chr17          | 62223693  | 62223699  | + | 8 |
| chr17          | 62223723  | 62223730  | + | 8 |
| chr17          | 74494643  | 74494655  | - | 8 |
| chr19          | 8517608   | 8517614   | + | 8 |
| chr19          | 17973425  | 17973441  | + | 8 |
| chr20          | 21116004  | 21116010  | + | 8 |
| chr20          | 57468131  | 57468136  | + | 8 |
| chr3           | 39449911  | 39449921  | + | 8 |
| chr3           | 39452545  | 39452572  | + | 8 |
| chr3           | 186504462 | 186504473 | + | 8 |
| chr5           | 110430681 | 110430686 | + | 8 |
| chr14          | 62247602  | 62247608  | + | 7 |
| chr15          | 25249957  | 25249975  | + | 7 |
| chr15          | 25311273  | 25311278  | + | 7 |
| chr15          | 25338215  | 25338224  | + | 7 |
| chr15          | 49307976  | 49307984  | - | 7 |
| chr3           | 185536271 | 185536282 | - | 7 |
| chr7           | 33458226  | 33458245  | + | 7 |
| chr7           | 138157031 | 138157035 | + | 7 |
| chr8           | 48975778  | 48975781  | + | 7 |
| chrX           | 24780158  | 24780162  | + | 7 |
| chr1           | 1412413   | 1412417   | + | 6 |
| chr1           | 13911106  | 13911109  | + | 6 |
| chr1           | 91412278  | 91412283  | - | 6 |
| chr1           | 162134502 | 162134506 | + | 6 |
| chr1           | 171471881 | 171471884 | + | 6 |
| chr1           | 223145923 | 223145927 | + | 6 |
| chr1           | 224853485 | 224853487 | + | 6 |
| chr10          | 12140881  | 12140883  | + | 6 |
| chr10          | 114717415 | 114717420 | + | 6 |
| chr10          | 114852686 | 114852690 | + | 6 |
| chr11          | 8705771   | 8705773   | + | 6 |
| chr11          | 75129933  | 75129937  | + | 6 |
| chr12          | 16145365  | 16145369  | + | 6 |
| chr12          | 52354919  | 52354924  | + | 6 |

|       |           |           |   |   |
|-------|-----------|-----------|---|---|
| chr12 | 109541290 | 109541294 | + | 6 |
| chr13 | 46109369  | 46109373  | + | 6 |
| chr13 | 111876560 | 111876564 | + | 6 |
| chr14 | 38667318  | 38667322  | + | 6 |
| chr14 | 70086989  | 70086993  | + | 6 |
| chr14 | 99972764  | 99972766  | + | 6 |
| chr14 | 104191212 | 104191216 | + | 6 |
| chr15 | 25232615  | 25232620  | + | 6 |
| chr15 | 25276146  | 25276148  | + | 6 |
| chr15 | 80420769  | 80420773  | + | 6 |
| chr15 | 84265025  | 84265029  | + | 6 |
| chr16 | 1724327   | 1724331   | + | 6 |
| chr16 | 28309510  | 28309514  | + | 6 |
| chr16 | 28313235  | 28313237  | + | 6 |
| chr16 | 81574985  | 81574987  | + | 6 |
| chr16 | 84742933  | 84742937  | + | 6 |
| chr17 | 4754005   | 4754009   | + | 6 |
| chr17 | 67525018  | 67525023  | + | 6 |
| chr18 | 56623103  | 56623107  | + | 6 |
| chr18 | 56630560  | 56630565  | + | 6 |
| chr19 | 2198503   | 2198507   | + | 6 |
| chr19 | 34878751  | 34878755  | + | 6 |
| chr2  | 44620762  | 44620772  | + | 6 |
| chr2  | 122360625 | 122360633 | - | 6 |
| chr2  | 135702639 | 135702641 | + | 6 |
| chr2  | 207026980 | 207026986 | + | 6 |
| chr2  | 210868762 | 210868766 | + | 6 |
| chr2  | 238582411 | 238582416 | + | 6 |
| chr2  | 239357553 | 239357555 | + | 6 |
| chr20 | 31351058  | 31351060  | + | 6 |
| chr20 | 60758201  | 60758203  | + | 6 |
| chr20 | 62654800  | 62654804  | + | 6 |
| chr3  | 15872384  | 15872394  | - | 6 |
| chr3  | 61553064  | 61553068  | + | 6 |
| chr3  | 61734437  | 61734441  | + | 6 |
| chr3  | 61756689  | 61756691  | + | 6 |
| chr3  | 76284932  | 76284936  | + | 6 |
| chr3  | 122929898 | 122929902 | + | 6 |
| chr3  | 172005771 | 172005775 | + | 6 |
| chr3  | 186504546 | 186504550 | + | 6 |
| chr3  | 192613116 | 192613123 | - | 6 |
| chr3  | 196851930 | 196851934 | - | 6 |
| chr4  | 6919530   | 6919534   | + | 6 |

|       |           |           |   |   |
|-------|-----------|-----------|---|---|
| chr4  | 8475493   | 8475497   | + | 6 |
| chr4  | 119200387 | 119200389 | + | 6 |
| chr4  | 129732994 | 129733010 | + | 6 |
| chr5  | 98132251  | 98132253  | + | 6 |
| chr6  | 15257992  | 15257995  | + | 6 |
| chr6  | 15276939  | 15276945  | + | 6 |
| chr6  | 44383308  | 44383312  | + | 6 |
| chr6  | 111843679 | 111843683 | + | 6 |
| chr7  | 2153382   | 2153388   | - | 6 |
| chr7  | 5635392   | 5635396   | + | 6 |
| chr7  | 26245411  | 26245413  | + | 6 |
| chr7  | 90695245  | 90695249  | + | 6 |
| chr7  | 93278529  | 93278533  | + | 6 |
| chr7  | 95764348  | 95764353  | - | 6 |
| chr8  | 1007746   | 1007748   | + | 6 |
| chr8  | 143624181 | 143624183 | + | 6 |
| chr9  | 132880174 | 132880178 | + | 6 |
| chrM  | 13900     | 13902     | + | 6 |
| chrX  | 2795965   | 2795969   | + | 6 |
| chrX  | 9489421   | 9489425   | + | 6 |
| chrX  | 21966159  | 21966163  | + | 6 |
| chrX  | 47056880  | 47056884  | + | 6 |
| chr1  | 1558314   | 1558318   | + | 5 |
| chr1  | 2163803   | 2163817   | + | 5 |
| chr1  | 2165077   | 2165081   | + | 5 |
| chr1  | 33283449  | 33283451  | + | 5 |
| chr1  | 64961983  | 64961985  | + | 5 |
| chr1  | 225192598 | 225192602 | + | 5 |
| chr1  | 230282161 | 230282163 | + | 5 |
| chr1  | 237266427 | 237266431 | + | 5 |
| chr10 | 72240374  | 72240376  | + | 5 |
| chr11 | 314523    | 314526    | + | 5 |
| chr11 | 65212495  | 65212499  | + | 5 |
| chr11 | 69461203  | 69461207  | + | 5 |
| chr11 | 74684456  | 74684460  | + | 5 |
| chr11 | 75304154  | 75304156  | + | 5 |
| chr11 | 100656371 | 100656375 | + | 5 |
| chr11 | 118342964 | 118342966 | + | 5 |
| chr11 | 118771467 | 118771471 | - | 5 |
| chr12 | 12972589  | 12972593  | + | 5 |
| chr12 | 51798774  | 51798776  | + | 5 |
| chr12 | 56552626  | 56552630  | + | 5 |
| chr12 | 98989470  | 98989474  | + | 5 |

|       |           |           |   |   |
|-------|-----------|-----------|---|---|
| chr12 | 98993517  | 98993524  | + | 5 |
| chr12 | 121137042 | 121137046 | + | 5 |
| chr12 | 132536827 | 132536831 | + | 5 |
| chr13 | 28240712  | 28240716  | + | 5 |
| chr13 | 28716214  | 28716219  | + | 5 |
| chr13 | 29690901  | 29690905  | + | 5 |
| chr13 | 43621966  | 43621968  | + | 5 |
| chr13 | 49793290  | 49793294  | - | 5 |
| chr13 | 100210284 | 100210286 | + | 5 |
| chr13 | 103307002 | 103307004 | + | 5 |
| chr13 | 111908912 | 111908916 | + | 5 |
| chr13 | 114163016 | 114163020 | + | 5 |
| chr13 | 114182742 | 114182746 | + | 5 |
| chr15 | 25229853  | 25229856  | + | 5 |
| chr15 | 25233884  | 25233888  | + | 5 |
| chr15 | 25315313  | 25315317  | + | 5 |
| chr15 | 25330824  | 25330827  | + | 5 |
| chr15 | 25333499  | 25333502  | + | 5 |
| chr15 | 49930933  | 49930937  | + | 5 |
| chr15 | 62689996  | 62690000  | + | 5 |
| chr15 | 99275017  | 99275022  | + | 5 |
| chr16 | 2814818   | 2814820   | + | 5 |
| chr16 | 13118264  | 13118268  | + | 5 |
| chr16 | 81570442  | 81570444  | + | 5 |
| chr16 | 84787963  | 84787968  | + | 5 |
| chr16 | 89202787  | 89202791  | + | 5 |
| chr17 | 2501630   | 2501632   | + | 5 |
| chr17 | 40627114  | 40627118  | + | 5 |
| chr17 | 65374656  | 65374660  | + | 5 |
| chr17 | 75404164  | 75404168  | + | 5 |
| chr17 | 78860442  | 78860446  | + | 5 |
| chr18 | 8627205   | 8627207   | + | 5 |
| chr18 | 55909617  | 55909621  | + | 5 |
| chr19 | 38409790  | 38409794  | + | 5 |
| chr2  | 982199    | 982201    | + | 5 |
| chr2  | 42891311  | 42891315  | + | 5 |
| chr2  | 44780790  | 44780794  | + | 5 |
| chr2  | 105673748 | 105673752 | + | 5 |
| chr2  | 168188475 | 168188479 | + | 5 |
| chr2  | 231742918 | 231742933 | + | 5 |
| chr2  | 236451853 | 236451857 | + | 5 |
| chr20 | 18727469  | 18727473  | + | 5 |
| chr20 | 30702455  | 30702459  | + | 5 |

|       |           |           |   |   |
|-------|-----------|-----------|---|---|
| chr21 | 17233508  | 17233512  | + | 5 |
| chr21 | 46908258  | 46908262  | + | 5 |
| chr22 | 17897581  | 17897585  | + | 5 |
| chr3  | 32936582  | 32936584  | + | 5 |
| chr3  | 61568709  | 61568711  | + | 5 |
| chr3  | 110791482 | 110791486 | + | 5 |
| chr3  | 173128660 | 173128662 | + | 5 |
| chr3  | 174476413 | 174476415 | + | 5 |
| chr4  | 2066871   | 2066873   | + | 5 |
| chr4  | 25370238  | 25370242  | + | 5 |
| chr4  | 39721097  | 39721101  | + | 5 |
| chr4  | 40941747  | 40941750  | - | 5 |
| chr4  | 93788818  | 93788822  | + | 5 |
| chr4  | 113894575 | 113894577 | + | 5 |
| chr4  | 120162523 | 120162525 | + | 5 |
| chr4  | 123763753 | 123763755 | + | 5 |
| chr4  | 146656969 | 146656971 | + | 5 |
| chr4  | 152443338 | 152443340 | + | 5 |
| chr4  | 184034442 | 184034446 | + | 5 |
| chr4  | 186590490 | 186590495 | - | 5 |
| chr5  | 1806411   | 1806415   | + | 5 |
| chr5  | 7807266   | 7807270   | + | 5 |
| chr5  | 43163532  | 43163536  | + | 5 |
| chr5  | 60808704  | 60808708  | + | 5 |
| chr5  | 71490943  | 71490945  | + | 5 |
| chr5  | 93697767  | 93697772  | - | 5 |
| chr5  | 112178391 | 112178395 | + | 5 |
| chr6  | 4819176   | 4819181   | + | 5 |
| chr6  | 15319629  | 15319633  | + | 5 |
| chr6  | 33611407  | 33611411  | + | 5 |
| chr6  | 57256332  | 57256340  | + | 5 |
| chr7  | 2285791   | 2285795   | + | 5 |
| chr7  | 127315958 | 127315962 | + | 5 |
| chr7  | 128850854 | 128850858 | + | 5 |
| chr8  | 589803    | 589808    | - | 5 |
| chr8  | 1777786   | 1777789   | + | 5 |
| chr8  | 35118345  | 35118349  | + | 5 |
| chr8  | 103955526 | 103955530 | + | 5 |
| chr8  | 144674705 | 144674709 | - | 5 |
| chr9  | 21905573  | 21905577  | + | 5 |
| chr9  | 91966267  | 91966271  | + | 5 |
| chr9  | 108357791 | 108357793 | + | 5 |
| chr9  | 128521584 | 128521588 | + | 5 |

|       |           |           |   |   |
|-------|-----------|-----------|---|---|
| chr9  | 131356179 | 131356181 | + | 5 |
| chr9  | 133917787 | 133917789 | + | 5 |
| chr9  | 134280889 | 134280893 | + | 5 |
| chr9  | 134292575 | 134292579 | + | 5 |
| chrM  | 1701      | 1707      | + | 5 |
| chrX  | 18478364  | 18478368  | + | 5 |
| chrX  | 73186096  | 73186100  | + | 5 |
| chr1  | 10502444  | 10502448  | + | 4 |
| chr1  | 19932220  | 19932222  | + | 4 |
| chr1  | 32511825  | 32511827  | + | 4 |
| chr1  | 45216668  | 45216672  | + | 4 |
| chr1  | 174871423 | 174871427 | + | 4 |
| chr1  | 182847814 | 182847816 | + | 4 |
| chr1  | 243954504 | 243954506 | - | 4 |
| chr10 | 83849179  | 83849183  | + | 4 |
| chr10 | 84557456  | 84557458  | + | 4 |
| chr11 | 60699629  | 60699633  | + | 4 |
| chr11 | 76245399  | 76245403  | + | 4 |
| chr11 | 82618402  | 82618406  | + | 4 |
| chr12 | 11843065  | 11843069  | + | 4 |
| chr12 | 117182406 | 117182408 | + | 4 |
| chr12 | 133129579 | 133129581 | + | 4 |
| chr13 | 107928713 | 107928717 | - | 4 |
| chr15 | 25277718  | 25277724  | + | 4 |
| chr16 | 25792607  | 25792611  | + | 4 |
| chr16 | 57502773  | 57502777  | + | 4 |
| chr17 | 2539293   | 2539297   | + | 4 |
| chr17 | 16962925  | 16962929  | + | 4 |
| chr17 | 40696103  | 40696107  | + | 4 |
| chr19 | 9273519   | 9273523   | + | 4 |
| chr19 | 45412501  | 45412505  | + | 4 |
| chr2  | 44669814  | 44669818  | + | 4 |
| chr2  | 197615847 | 197615851 | + | 4 |
| chr2  | 233069702 | 233069706 | + | 4 |
| chr20 | 21358354  | 21358358  | + | 4 |
| chr22 | 20113953  | 20113955  | + | 4 |
| chr22 | 39801776  | 39801778  | + | 4 |
| chr22 | 50921837  | 50921839  | + | 4 |
| chr3  | 32862234  | 32862236  | + | 4 |
| chr3  | 50952519  | 50952521  | + | 4 |
| chr3  | 61568262  | 61568269  | + | 4 |
| chr3  | 162885867 | 162885871 | + | 4 |
| chr4  | 183152170 | 183152174 | + | 4 |



|                |           |           |   |   |
|----------------|-----------|-----------|---|---|
| chr5           | 132406859 | 132406863 | + | 4 |
| chr6           | 15253163  | 15253167  | + | 4 |
| chr6           | 15317846  | 15317850  | + | 4 |
| chr6           | 15411586  | 15411590  | + | 4 |
| chr6           | 21805739  | 21805741  | + | 4 |
| chr6           | 89451990  | 89451992  | - | 4 |
| chr6           | 149111641 | 149111645 | + | 4 |
| chr7           | 8011777   | 8011781   | + | 4 |
| chr7           | 127452637 | 127452641 | + | 4 |
| chr7           | 127540896 | 127540900 | + | 4 |
| chr8           | 26179827  | 26179830  | + | 4 |
| chr8           | 30339339  | 30339343  | + | 4 |
| chr9           | 88630451  | 88630453  | + | 4 |
| chr9           | 115551068 | 115551072 | + | 4 |
| chrUn_gl000220 | 117847    | 117860    | + | 4 |
| chrUn_gl000220 | 118063    | 118065    | + | 4 |

---

**Table S3. The sequence of 24 clones from hnRNPM individual-CLIP in circURI1**

| No.      |    | Sequence                                                                  |                      |
|----------|----|---------------------------------------------------------------------------|----------------------|
| 2 clones | 1  | TTTTTTTTTTGCTGTAGGTTTAGTTGAGCACCGGAAAGAACGAAGAAGGTAGATAATGACTATAATGCCCTTC | GAGAAAGACTCAGCACCTTG |
|          | 2  | TTTTTTTTTTGCTGTAGGTTTAGTTGAGCACCGGAAAGAACGAAGAAGGTAGATAATGACTATAATGCCCTTC | GAGAAAGACTCAGCACCTTG |
| 5 clones | 3  | TTTTTTTTTTCTGTAGGTTTAGTTGAGCACCGGAAAGAACGAAGAAGGTAGATAATGACTATAATGCCCTTC  | GAGAAAGACTCAGCACCTTG |
|          | 4  | TTTTTTTTTTCTGTAGGTTTAGTTGAGCACCGGAAAGAACGAAGAAGGTAGATAATGACTATAATGCCCTTC  | GAGAAAGACTCAGCACCTTG |
|          | 5  | TTTTTTTTTTCTGTAGGTTTAGTTGAGCACCGGAAAGAACGAAGAAGGTAGATAATGACTATAATGCCCTTC  | GAGAAAGACTCAGCACCTTG |
|          | 6  | TTTTTTTTTTCTGTAGGTTTAGTTGAGCACCGGAAAGAACGAAGAAGGTAGATAATGACTATAATGCCCTTC  | GAGAAAGACTCAGCACCTTG |
|          | 7  | TTTTTTTTTTCTGTAGGTTTAGTTGAGCACCGGAAAGAACGAAGAAGGTAGATAATGACTATAATGCCCTTC  | GAGAAAGACTCAGCACCTTG |
| 7 clones | 8  | TTTTTTTTTTGTAGGTTTAGTTGAGCACCGGAAAGAACGAAGAAGGTAGATAATGACTATAATGCCCTTC    | GAGAAAGACTCAGCACCTTG |
|          | 9  | TTTTTTTTTTGTAGGTTTAGTTGAGCACCGGAAAGAACGAAGAAGGTAGATAATGACTATAATGCCCTTC    | GAGAAAGACTCAGCACCTTG |
|          | 10 | TTTTTTTTTTGTAGGTTTAGTTGAGCACCGGAAAGAACGAAGAAGGTAGATAATGACTATAATGCCCTTC    | GAGAAAGACTCAGCACCTTG |
|          | 11 | TTTTTTTTTTGTAGGTTTAGTTGAGCACCGGAAAGAACGAAGAAGGTAGATAATGACTATAATGCCCTTC    | GAGAAAGACTCAGCACCTTG |
|          | 12 | TTTTTTTTTTGTAGGTTTAGTTGAGCACCGGAAAGAACGAAGAAGGTAGATAATGACTATAATGCCCTTC    | GAGAAAGACTCAGCACCTTG |
|          | 13 | TTTTTTTTTTGTAGGTTTAGTTGAGCACCGGAAAGAACGAAGAAGGTAGATAATGACTATAATGCCCTTC    | GAGAAAGACTCAGCACCTTG |
|          | 14 | TTTTTTTTTTGTAGGTTTAGTTGAGCACCGGAAAGAACGAAGAAGGTAGATAATGACTATAATGCCCTTC    | GAGAAAGACTCAGCACCTTG |
| 7 clones | 15 | TTTTTTTTTTGTTGAGCACCGGAAAGAACGGAGAAGGTAGATAATGACTATAATGCCCTTC             | GAGAAAGACTCAGCACCTTG |
|          | 16 | TTTTTTTTTTGTTGAGCACCGGAAAGAACGAAGAAGGTAGATAATGACTATAATGCCCTTC             | GAGAAAGACTCAGCACCTTG |
|          | 17 | TTTTTTTTTTGTTGAGCACCGGAAAGAACGAAGAAGGTAGATAATGACTATAATGCCCTTC             | GAGAAAGACTCAGCACCTTG |
|          | 18 | TTTTTTTTTTGTTGAGCACCGGAAAGAACGAAGAAGGTAGATAATGACTATAATGCCCTTC             | GAGAAAGACTCAGCACCTTG |
|          | 19 | TTTTTTTTTTGTTGAGCACCGGAAAGAACGGAGAAGGTAGATAATGACTATAATGCCCTTC             | GAGAAAGACTCAGCACCTTG |
|          | 20 | TTTTTTTTTTGTTGAGCACCGGAAAGAACGGAGAAGGTAGATAATGACTATAATGCCCTTC             | GAGAAAGACTCAGCACCTTG |
|          | 21 | TTTTTTTTTTGTTGAGCACCGGAAAGAACGGAGAAGGTAGATAATGACTATAATGCCCTTC             | GAGAAAGACTCAGCACCTTG |
| 3 clones | 22 | TTTTTTTTTTTACCAGGAAAGAACGAAGAAGGTAGATAATGACTATAATGCCCTTC                  | GAGAAAGACTCAGCACCTTG |
|          | 23 | TTTTTTTTTTTACCAGGAAAGAACGAAGAAGGTAGATAATGACTATAATGCCCTTC                  | GAGAAAGACTCAGCACCTTG |
|          | 24 | TTTTTTTTTTTACCAGGAAAGAACGAAGAAGGTAGATAATGACTATAATGCCCTTC                  | GAGAAAGACTCAGCACCTTG |

**circURI1-specific primer was highlighted in gray; Oligo(dT) sequence located on the left.**

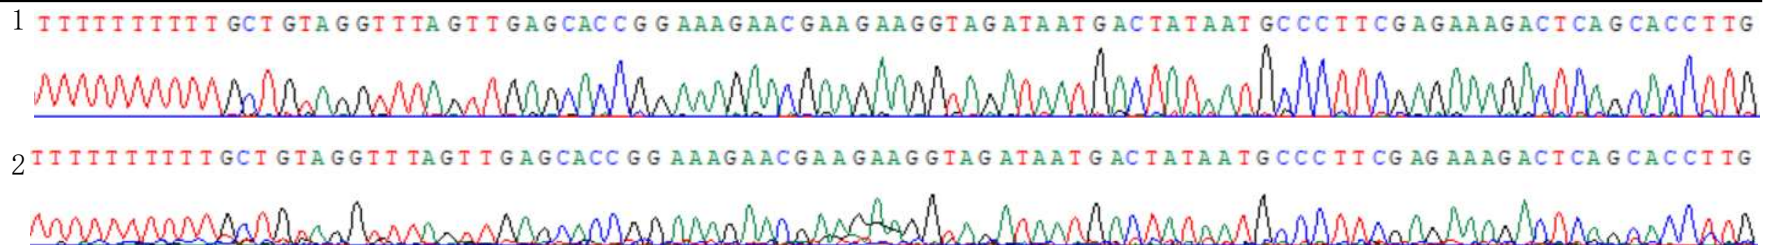

3 TTTTTTTTCTGTAGGTTTGGTTGAGCACCGGAAAGAACGAAGAAGGTAGATAATGACTATAATGCCCTTCGAGAAAGACTCAGCACCTTG

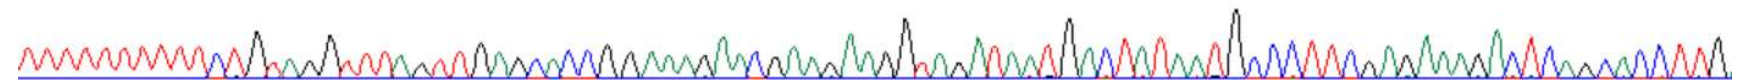

4 TTTTTTTTCTGTAGGTTTGGTTGAGCACCGGAAAGAACGAAGAAGGTAGATAATGACTATAATGCCCTTCGAGAAAGACTCAGCACCTTG

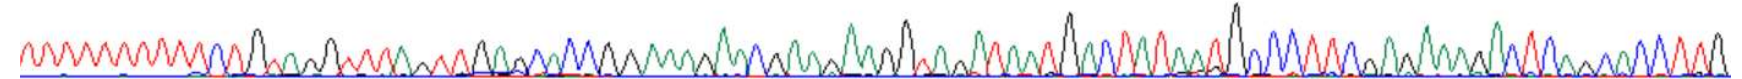

5 TTTTTTTTTCGTAGGTTTAGTTGAGCACCGGAAAGAACGAAGAAGGTAGATAATGACTATAATGCCCTTCGAGAAAGACTCAGCACCTTG

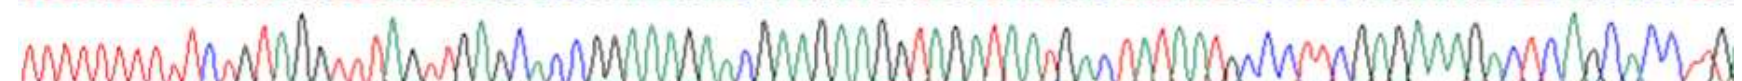

6 TTTTTTTTTCGTAGGTTTAGTTGAGCACCGGAAAGAACGAAGAAGGTAGATAATGACTATAATGCCCTTCGAGAAAGACTCAGCACCTTG

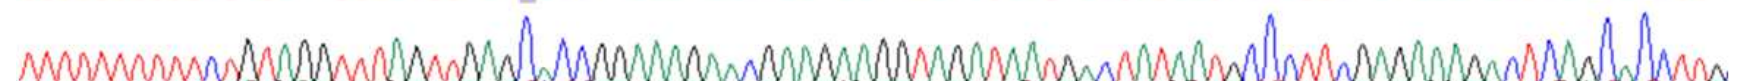

7 TTTTTTTTTCGTAGGTTTAGTTGAGCACCGGAAAGAACGAAGAAGGTAGATAATGACTATAATGCCCTTCGAGAAAGACTCAGCACCTTG

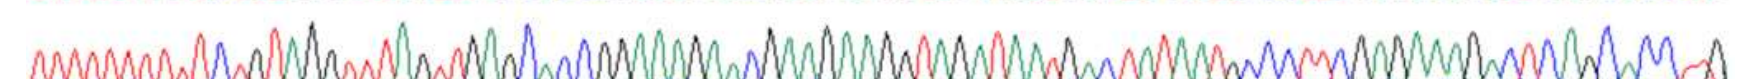

8 TTTTTTTTGTAGGTTTGGTTGAGCACCGGAAAGAACGAAGAAGGTAGATAATGACTATAATGCCCTTCGAGAAAGACTCAGCACCTTG

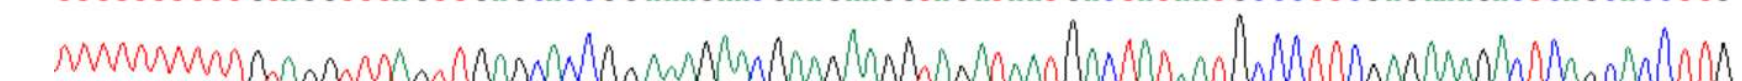

9 TTTTTTTTGTAGGTTTAGTTGAGCACCGGAAAGAACGAAGAAGGTAGATAATGACTATAATGCCCTTCGAGAAAGACTCAGCACCTTG

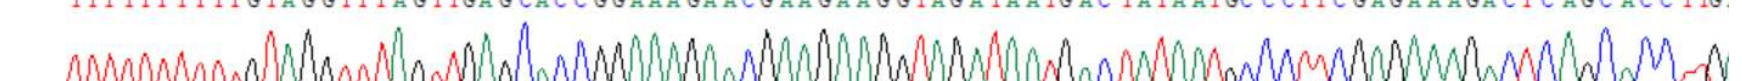

10 TTTTTTTTGTAGGTTTAGTTGAGCACCGGAAAGAACGAAGAAGGTAGATAATGACTATAATGCCCTTCGAGAAAGACTCAGCACCTTG

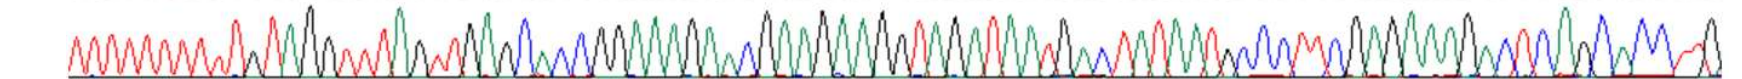

11 TTTTTTTTGTAGGTTTAGTTGAGCACCGGAAAGAACGAAGAAGGTAGATAATGACTATAATGCCCTTCGAGAAAGACTCAGCACCTTG

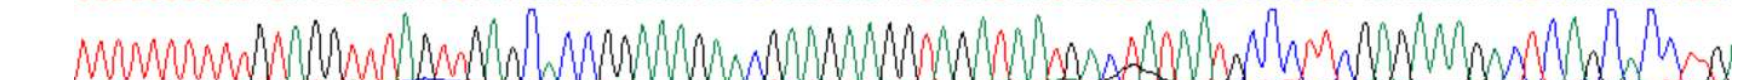

12

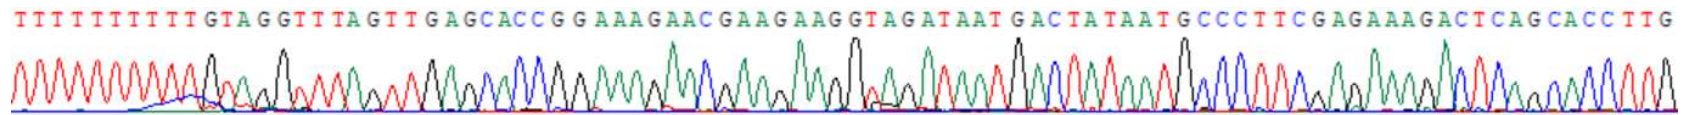

13

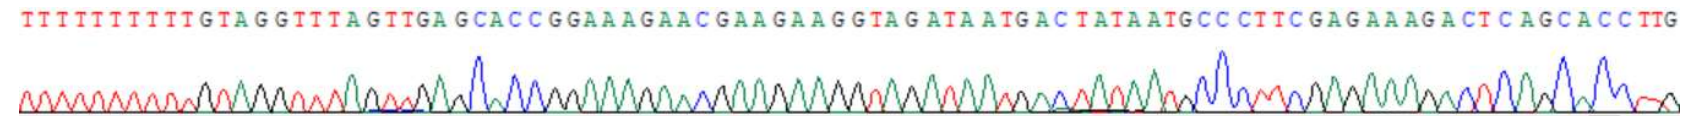

14

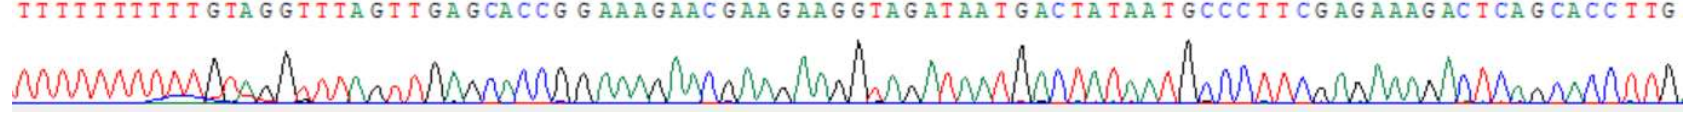

15

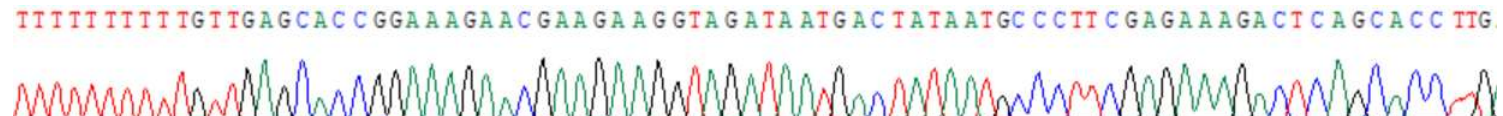

16

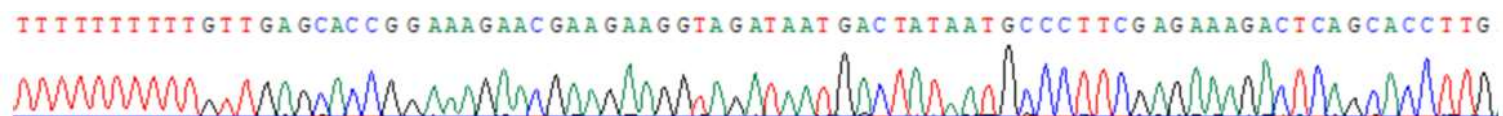

17

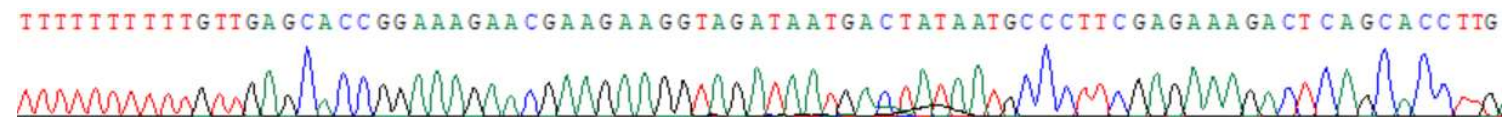

18

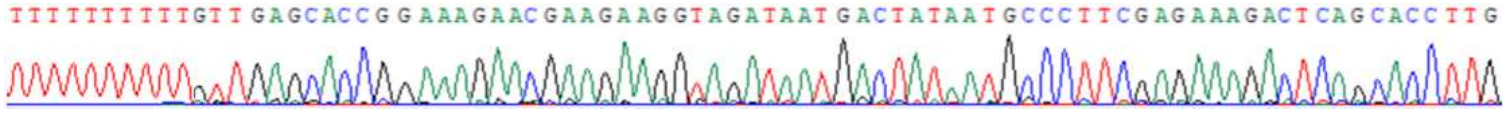

19

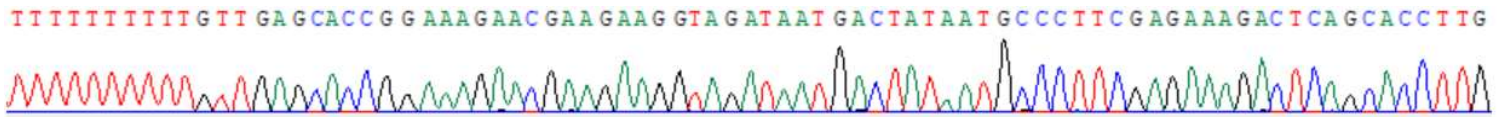

20

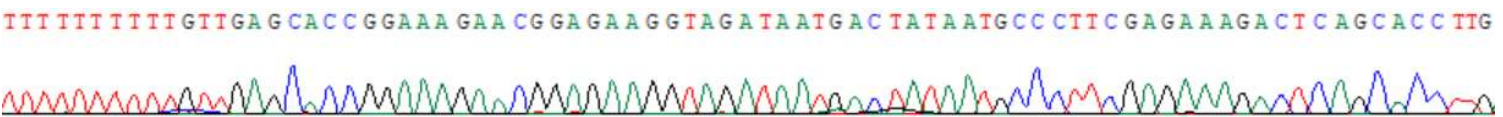

21

TTTTTTTTTGTGGAGCACCGGAAAGAACGGAGAAGGTAGATAATGACTATAATGCCCTTCGAGAAAGACTCAGCACCTTG

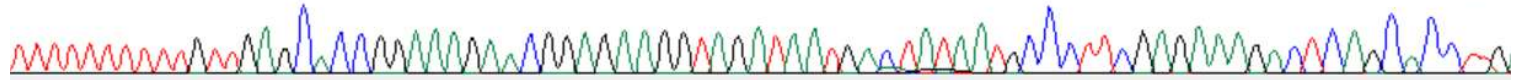

22

TTTTTTTTTTCACCGGAAAGAACGAAGAAGGTAGATAATGACTATAATGCCCTTCGAGAAAGACTCAGCACCTTG

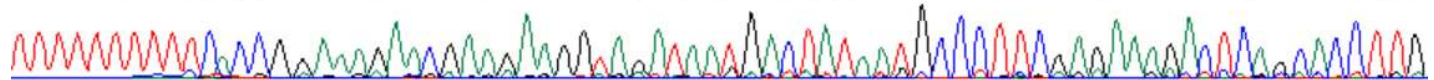

23

TTTTTTTTTTCACCGGAAAGAACGAAAGAAGGTAGATAATGACTATAATGCCCTTCGAGAAAGACTCAGCACCTTG

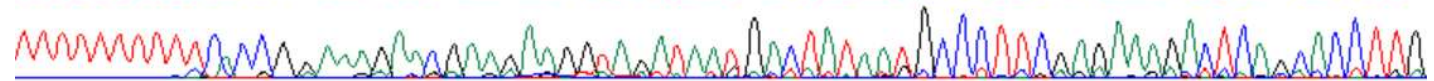

24

TTTTTTTTTTCACCGGAAAGAACGAAGAAGGTAGATAATGACTATAATGCCCTTCGAGAAAGACTCAGCACCTTG

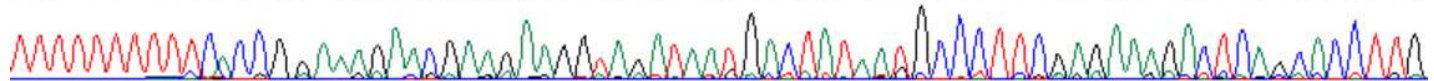

**Table S4.****Differential analysis of alternative splicing upon circURI1 knockdown.**

| Gene      | Chrom | Exon start | Exon stop | PSI of siNC | PSI of siCirc-1 | P value<br>(siCirc-1 vs siNC) | PSI of siCirc-2 | P value<br>(siCirc-2 vs siNC) |
|-----------|-------|------------|-----------|-------------|-----------------|-------------------------------|-----------------|-------------------------------|
| GMPR2     | chr14 | 24703312   | 24703447  | 0.758       | 0.861           | 1.06171E-07                   | 0.909           | 2.02025E-08                   |
| DNMT3A    | chr2  | 25472525   | 25472593  | 0.222       | 0.583           | 0.036546341                   | 0.556           | 0.010636855                   |
| SENP1     | chr12 | 48482945   | 48483076  | 0.750       | 0.935           | 1.40519E-05                   | 0.892           | 0.011066885                   |
| KIAA1217  | chr10 | 24831621   | 24831699  | 0.118       | 0.333           | 0.038112373                   | 0.308           | 0.025347319                   |
| AKT1      | chr14 | 105259463  | 105259547 | 0.212       | 0.344           | 0.000161485                   | 0.366           | 0.038867104                   |
| RAB11FIP1 | chr8  | 37728795   | 37730697  | 0.420       | 0.560           | 0.046118177                   | 0.484           | 0.084234195                   |
| NR4A1     | chr12 | 52446279   | 52446429  | 0.498       | 0.583           | 6.25588E-06                   | 0.579           | 0.012806798                   |
| RNF24     | chr20 | 3954978    | 3955047   | 0.492       | 0.614           | 0.016421754                   | 0.595           | 3.16642E-07                   |
| ARMC8     | chr3  | 137907242  | 137907372 | 0.500       | 0.714           | 0.035938931                   | 0.640           | 0.042602365                   |
| VEGFA     | chr6  | 43749692   | 43749824  | 0.164       | 0.225           | 6.15097E-29                   | 0.298           | 1.71857E-43                   |
| DNAJB5    | chr9  | 34990664   | 34990809  | 0.889       | 0.769           | 0.047338026                   | 0.731           | 0.044299419                   |
| B3GALNT2  | chr1  | 235659495  | 235659618 | 0.574       | 0.496           | 0.030427426                   | 0.474           | 0.005031573                   |
| SCEL      | chr13 | 78167648   | 78167708  | 0.167       | 0.000           | 0                             | 0.063           | 0.009823275                   |
| LGALS8    | chr1  | 236706214  | 236706340 | 0.214       | 0.135           | 2.04572E-05                   | 0.136           | 0.000754764                   |
| EPB41     | chr1  | 29385100   | 29385157  | 0.541       | 0.375           | 8.83413E-10                   | 0.364           | 1.57637E-05                   |
| RGS5      | chr1  | 163288971  | 163289081 | 0.231       | 0.100           | 0.042602365                   | 0.056           | 0.008705089                   |
| ARRB1     | chr11 | 74982744   | 74982768  | 0.824       | 0.545           | 0.000708557                   | 0.600           | 0.038613801                   |
| FAM135A   | chr6  | 71195869   | 71195947  | 0.603       | 0.514           | 4.3795E-08                    | 0.466           | 0.005296283                   |
| LPIN1     | chr2  | 11916211   | 11916319  | 0.600       | 0.550           | 0.024618761                   | 0.526           | 0.036410438                   |
| PEX2      | chr8  | 77900542   | 77900574  | 0.217       | 0.087           | 0.026416147                   | 0.100           | 0.033894854                   |
| SS18L1    | chr20 | 60729336   | 60729521  | 0.140       | 0.348           | 0.001073771                   | 0.342           | 5.20345E-05                   |
| ZCCHC10   | chr5  | 132358532  | 132358598 | 0.659       | 0.455           | 0.004329928                   | 0.484           | 0.002606079                   |
| SLC25A26  | chr3  | 66354876   | 66354961  | 0.839       | 0.740           | 0.009252698                   | 0.540           | 3.3456E-08                    |
| FXD3      | chr19 | 35610071   | 35610155  | 0.600       | 0.417           | 0.011458046                   | 0.375           | 0.028459737                   |
| NBPF15    | chr1  | 148577071  | 148577251 | 0.263       | 0.000           | 0                             | 0.105           | 0.024920361                   |
| SUPT20H   | chr13 | 37584688   | 37584792  | 0.438       | 0.500           | 8.11407E-06                   | 0.492           | 4.03193E-06                   |
| BCAR1     | chr16 | 75298248   | 75298499  | 0.877       | 0.962           | 0.000402703                   | 0.932           | 0.018326089                   |
| TRAF3     | chr14 | 103296670  | 103296809 | 0.069       | 0.226           | 0.046970956                   | 0.161           | 0.038857633                   |
| RNF146    | chr6  | 127607194  | 127607322 | 0.260       | 0.336           | 0.037372988                   | 0.390           | 1.71911E-05                   |

**PSI=Percentage Spliced In. P-values were calculated by Chi-square test.**

## Differential analysis of alternative splicing upon hnRNPM knockdown.

| Gene       | Chrom | Exon start | Exon stop | PSI of siNC | PSI of siM-1 | P value<br>(siM-1 vs siNC) | PSI of siM-2 | P value<br>(siM-2 vs siNC) |
|------------|-------|------------|-----------|-------------|--------------|----------------------------|--------------|----------------------------|
| KIAA1217   | chr10 | 24831621   | 24831699  | 0.118       | 0.000        | 0                          | 0.000        | 0                          |
| DNAJB5     | chr9  | 34990664   | 34990809  | 0.889       | 1.000        | 0                          | 1.000        | 0                          |
| DTYMK      | chr2  | 242619643  | 242619734 | 0.169       | 0.059        | 1.14013E-27                | 0.072        | 5.95984E-23                |
| DBF4B      | chr17 | 42809545   | 42809633  | 0.652       | 0.194        | 1.8445E-19                 | 0.230        | 4.86043E-10                |
| CTTN       | chr11 | 70267575   | 70267686  | 0.304       | 0.196        | 3.44657E-19                | 0.218        | 1.27894E-10                |
| GANAB      | chr11 | 62401781   | 62401847  | 0.665       | 0.765        | 5.55723E-19                | 0.723        | 1.37836E-06                |
| CD59       | chr11 | 33752969   | 33753014  | 0.562       | 0.692        | 5.3305E-18                 | 0.642        | 1.27685E-10                |
| CHCHD4     | chr3  | 14163416   | 14163586  | 0.441       | 0.784        | 3.58255E-17                | 0.750        | 2.12131E-27                |
| ENC1       | chr5  | 73933318   | 73933443  | 0.744       | 0.367        | 5.10074E-16                | 0.194        | 1.17083E-32                |
| CHKA       | chr11 | 67848870   | 67848924  | 0.198       | 0.078        | 1.1634E-15                 | 0.090        | 4.32804E-24                |
| YPEL5      | chr2  | 30371110   | 30371171  | 0.762       | 0.943        | 1.36799E-15                | 0.888        | 5.6609E-05                 |
| KLHL5      | chr4  | 39064178   | 39064655  | 0.888       | 0.697        | 3.24449E-15                | 0.604        | 3.80366E-18                |
| CD55       | chr1  | 207523482  | 207523567 | 0.980       | 0.771        | 1.26575E-14                | 0.798        | 4.46806E-13                |
| ANKRD11    | chr16 | 89497663   | 89497734  | 0.970       | 0.839        | 1.32624E-14                | 0.912        | 2.36742E-33                |
| ST6GALNAC6 | chr9  | 130660234  | 130660289 | 0.301       | 0.145        | 4.60037E-14                | 0.146        | 6.08397E-25                |
| SMG7       | chr1  | 183481971  | 183482003 | 0.349       | 0.068        | 5.21586E-13                | 0.133        | 4.60887E-05                |
| KRBOX4     | chrX  | 46330576   | 46330620  | 0.903       | 0.360        | 1.09076E-12                | 0.536        | 1.3356E-05                 |
| VEGFA      | chr6  | 43749692   | 43749824  | 0.164       | 0.113        | 2.36952E-12                | 0.114        | 6.62788E-05                |
| UCHL5      | chr1  | 192989436  | 192989511 | 0.294       | 0.524        | 2.42116E-12                | 0.506        | 0.000217641                |
| PPP6R3     | chr11 | 68350510   | 68350597  | 0.303       | 0.131        | 3.2782E-12                 | 0.190        | 7.12221E-05                |
| ZDHHC20    | chr13 | 21952799   | 21952877  | 0.595       | 0.871        | 5.2137E-12                 | 0.825        | 3.47568E-12                |
| RHOC       | chr1  | 113247721  | 113247790 | 0.318       | 0.229        | 7.43772E-12                | 0.152        | 1.08133E-71                |
| NEK6       | chr9  | 127055127  | 127055292 | 0.878       | 0.957        | 1.29153E-11                | 0.932        | 0.004408606                |
| GMPR2      | chr14 | 24703312   | 24703447  | 0.758       | 0.375        | 3.98937E-11                | 0.333        | 9.69145E-25                |
| HPS5       | chr11 | 18339297   | 18339454  | 0.423       | 0.111        | 1.90426E-10                | 0.167        | 5.47399E-11                |
| ASNS       | chr7  | 97501030   | 97501308  | 0.388       | 0.512        | 1.92667E-10                | 0.494        | 5.11327E-10                |
| CD40       | chr20 | 44751764   | 44751858  | 0.147       | 0.048        | 2.41289E-10                | 0.059        | 1.77499E-05                |
| B3GALNT2   | chr1  | 235659495  | 235659618 | 0.474       | 0.636        | 4.71742E-10                | 0.637        | 1.25321E-05                |
| MCAT       | chr22 | 43533086   | 43533304  | 0.220       | 0.067        | 5.45038E-10                | 0.115        | 0.000399911                |
| WASF1      | chr6  | 110499800  | 110499945 | 0.404       | 0.545        | 1.53977E-09                | 0.484        | 0.001509759                |
| SLC25A26   | chr3  | 66286967   | 66287124  | 0.311       | 0.392        | 1.56343E-09                | 0.545        | 9.01972E-19                |
| UMAD1      | chr7  | 7715732    | 7715839   | 0.410       | 0.800        | 1.85057E-09                | 0.679        | 2.39177E-06                |

|          |       |           |           |       |       |             |       |             |
|----------|-------|-----------|-----------|-------|-------|-------------|-------|-------------|
| SLC2A8   | chr9  | 130160183 | 130160390 | 0.150 | 0.066 | 5.02326E-09 | 0.071 | 2.01377E-22 |
| CTBP2    | chr10 | 126822080 | 126822181 | 0.927 | 0.514 | 6.26164E-09 | 0.536 | 5.58999E-11 |
| CTAGE5   | chr14 | 39790131  | 39790260  | 0.194 | 0.286 | 9.24004E-09 | 0.297 | 3.38264E-05 |
| IKBKB    | chr8  | 42177102  | 42177164  | 0.286 | 0.063 | 1.00408E-08 | 0.135 | 0.010599544 |
| ZNF507   | chr19 | 32838150  | 32838244  | 0.375 | 0.061 | 1.04372E-08 | 0.167 | 0.006169899 |
| RHOT1    | chr17 | 30499955  | 30500079  | 0.925 | 0.615 | 1.21515E-08 | 0.447 | 4.33026E-10 |
| FIP1L1   | chr4  | 54280781  | 54280889  | 0.286 | 0.483 | 1.39527E-08 | 0.402 | 0.00035504  |
| PRKAR1A  | chr17 | 66511127  | 66511260  | 0.713 | 0.547 | 1.51013E-08 | 0.504 | 5.63103E-17 |
| TLK2     | chr17 | 60601596  | 60601692  | 0.500 | 0.243 | 2.0761E-08  | 0.381 | 0.001223625 |
| FHL2     | chr2  | 106013103 | 106013154 | 0.349 | 0.225 | 2.20611E-08 | 0.219 | 2.11093E-10 |
| CYB561D2 | chr3  | 50389439  | 50389477  | 0.205 | 0.057 | 3.34737E-08 | 0.058 | 1.05951E-14 |
| NFIX     | chr19 | 13198802  | 13198950  | 0.659 | 0.861 | 8.12373E-08 | 0.764 | 0.016935158 |
| MLH3     | chr14 | 75500121  | 75500193  | 0.406 | 0.159 | 8.37991E-08 | 0.286 | 0.015045679 |
| SNX7     | chr1  | 99128252  | 99128372  | 0.689 | 0.375 | 1.03132E-07 | 0.556 | 0.000655982 |
| NCOR2    | chr12 | 124858958 | 124859009 | 0.462 | 0.244 | 2.62292E-07 | 0.351 | 0.025144461 |
| C16orf13 | chr16 | 685611    | 685774    | 0.208 | 0.269 | 3.02041E-07 | 0.266 | 4.76745E-26 |
| ADNP     | chr20 | 49521302  | 49521386  | 0.804 | 0.938 | 3.18636E-07 | 0.905 | 0.012236223 |
| ZNF74    | chr22 | 20749622  | 20749708  | 0.429 | 0.083 | 3.75138E-07 | 0.118 | 0.000789113 |
| MARK2    | chr11 | 63671457  | 63671619  | 0.059 | 0.182 | 4.41724E-07 | 0.131 | 3.02935E-06 |
| CREB1    | chr2  | 208425842 | 208425884 | 0.718 | 0.635 | 4.60696E-07 | 0.512 | 0.011423173 |
| UQCRH    | chr1  | 46774772  | 46774799  | 0.307 | 0.220 | 5.96763E-07 | 0.220 | 8.80442E-09 |
| CAMTA2   | chr17 | 4885383   | 4885455   | 0.281 | 0.071 | 6.20928E-07 | 0.160 | 0.011154874 |
| SAR1A    | chr10 | 71922445  | 71922515  | 0.896 | 0.950 | 6.32018E-07 | 0.957 | 7.84952E-11 |
| SAMD4A   | chr14 | 55251057  | 55251165  | 0.516 | 0.839 | 1.0435E-06  | 0.857 | 2.5903E-07  |
| GIPC1    | chr19 | 14603668  | 14603724  | 0.211 | 0.106 | 1.20777E-06 | 0.074 | 1.00198E-48 |
| MAP3K7   | chr6  | 91254270  | 91254351  | 0.308 | 0.208 | 1.34939E-06 | 0.220 | 0.001163536 |
| TRMU     | chr22 | 46739158  | 46739265  | 0.142 | 0.071 | 1.44123E-06 | 0.066 | 0.00058588  |
| ZNF195   | chr11 | 3394806   | 3394886   | 0.435 | 0.167 | 1.73637E-06 | 0.225 | 0.00115391  |
| TMEM51   | chr1  | 15536985  | 15537058  | 0.312 | 0.212 | 1.84848E-06 | 0.211 | 6.1847E-05  |
| SPOP     | chr17 | 47753256  | 47753378  | 0.821 | 0.455 | 4.63296E-06 | 0.737 | 0.016156931 |
| NR4A1    | chr12 | 52446279  | 52446429  | 0.558 | 0.373 | 4.88463E-06 | 0.426 | 0.004468199 |
| C11orf49 | chr11 | 47008758  | 47008861  | 0.375 | 0.079 | 4.94843E-06 | 0.087 | 0.000207502 |
| FAM173B  | chr5  | 10235322  | 10235373  | 0.250 | 0.198 | 5.51953E-06 | 0.163 | 9.68865E-05 |
| ADAM15   | chr1  | 155033890 | 155033965 | 0.908 | 0.787 | 5.64764E-06 | 0.847 | 7.95764E-10 |
| POC1A    | chr3  | 52130584  | 52130728  | 0.217 | 0.149 | 6.6131E-06  | 0.138 | 0.00016232  |



|          |       |           |           |       |       |             |       |             |
|----------|-------|-----------|-----------|-------|-------|-------------|-------|-------------|
| MR1      | chr19 | 6897438   | 6897558   | 0.207 | 0.095 | 6.68717E-06 | 0.104 | 0.002052116 |
| PML      | chr15 | 74324912  | 74325056  | 0.308 | 0.082 | 6.97529E-06 | 0.043 | 1.76673E-12 |
| RBM6     | chr3  | 50036872  | 50036946  | 0.544 | 0.352 | 8.65937E-06 | 0.360 | 1.37562E-11 |
| RDH13    | chr19 | 55559413  | 55559625  | 0.742 | 0.872 | 8.97037E-06 | 0.807 | 0.008444198 |
| DYRK2    | chr12 | 68043576  | 68043725  | 0.088 | 0.170 | 9.75871E-06 | 0.194 | 3.06872E-16 |
| MAPKAP1  | chr9  | 128268588 | 128268696 | 0.423 | 0.246 | 1.00924E-05 | 0.290 | 0.000572739 |
| SMARCC2  | chr12 | 56566720  | 56566813  | 0.742 | 0.905 | 1.22653E-05 | 0.818 | 0.021876816 |
| CRELD1   | chr3  | 9985585   | 9985779   | 0.830 | 0.946 | 2.54771E-05 | 0.935 | 0.001386145 |
| FNIP1    | chr5  | 131046270 | 131046354 | 0.412 | 0.161 | 2.74803E-05 | 0.286 | 0.033894854 |
| MRPL55   | chr1  | 228296655 | 228296722 | 0.246 | 0.184 | 2.9852E-05  | 0.161 | 0.000674828 |
| LRRC42   | chr1  | 54413460  | 54413494  | 0.338 | 0.438 | 3.0346E-05  | 0.409 | 0.002448565 |
| IFIT1    | chr10 | 91159646  | 91159760  | 0.571 | 0.804 | 3.95702E-05 | 0.755 | 2.6665E-05  |
| PCBP4    | chr3  | 51995956  | 51996104  | 0.299 | 0.409 | 3.97172E-05 | 0.375 | 0.001066541 |
| PUM2     | chr2  | 20526021  | 20526146  | 0.226 | 0.500 | 4.11373E-05 | 0.286 | 0.018305577 |
| ZNF384   | chr12 | 6787828   | 6787876   | 0.623 | 0.490 | 4.30031E-05 | 0.565 | 0.019625855 |
| DNAJA3   | chr16 | 4504811   | 4504928   | 0.585 | 0.479 | 4.49849E-05 | 0.431 | 2.35193E-09 |
| DEDD2    | chr19 | 42708613  | 42708711  | 1.000 | 0.682 | 4.6151E-05  | 0.750 | 0.000132915 |
| ENSA     | chr1  | 150598954 | 150599002 | 0.794 | 0.718 | 4.84956E-05 | 0.721 | 6.43683E-05 |
| CLASP1   | chr2  | 122166599 | 122166623 | 0.750 | 0.667 | 5.44731E-05 | 0.516 | 0.002603112 |
| ABI2     | chr2  | 204276007 | 204276094 | 0.288 | 0.358 | 5.94442E-05 | 0.396 | 0.000395335 |
| AURKA    | chr20 | 54965611  | 54965721  | 0.342 | 0.257 | 6.18822E-05 | 0.211 | 5.43433E-07 |
| ZNF772   | chr19 | 57986391  | 57986514  | 0.857 | 0.528 | 6.98746E-05 | 0.444 | 0.00375221  |
| SLC35B3  | chr6  | 8418976   | 8419118   | 0.654 | 0.767 | 7.3632E-05  | 0.761 | 0.034231239 |
| TNIK     | chr3  | 170846502 | 170846667 | 0.018 | 0.208 | 7.40179E-05 | 0.143 | 7.86269E-11 |
| PTPRA    | chr20 | 2955860   | 2955887   | 1.000 | 0.871 | 8.00387E-05 | 0.947 | 0.015140885 |
| POFUT2   | chr21 | 46685936  | 46686142  | 0.723 | 0.505 | 8.29332E-05 | 0.493 | 9.6504E-07  |
| SEC24B   | chr4  | 110402832 | 110402937 | 0.771 | 0.631 | 8.48446E-05 | 0.549 | 0.001727818 |
| ZNF706   | chr8  | 102216877 | 102216921 | 0.778 | 0.217 | 0.000106253 | 0.231 | 0.000613905 |
| ARHGAP12 | chr10 | 32128564  | 32128639  | 0.174 | 0.349 | 0.000108367 | 0.352 | 0.000111752 |
| PPP2R4   | chr9  | 131890242 | 131890347 | 0.747 | 0.625 | 0.000118222 | 0.522 | 1.83235E-05 |
| RHOT1    | chr17 | 30538134  | 30538257  | 0.465 | 0.735 | 0.000119319 | 0.806 | 2.35112E-12 |
| METTL15  | chr11 | 28349641  | 28349712  | 0.553 | 0.773 | 0.000129098 | 0.667 | 0.008539601 |
| FEZ2     | chr2  | 36787927  | 36788008  | 0.849 | 0.751 | 0.000151594 | 0.782 | 0.002330142 |
| AKT1     | chr14 | 105259463 | 105259547 | 0.212 | 0.091 | 0.000155865 | 0.100 | 0.020481628 |
| DTX2     | chr7  | 76126653  | 76126794  | 0.044 | 0.185 | 0.000170849 | 0.215 | 2.37311E-08 |

|           |       |           |           |       |       |             |       |             |
|-----------|-------|-----------|-----------|-------|-------|-------------|-------|-------------|
| TTC8      | chr14 | 89307768  | 89307858  | 0.158 | 0.500 | 0.000197246 | 0.417 | 0.000435954 |
| MFF       | chr2  | 228207460 | 228207535 | 0.786 | 0.566 | 0.00022478  | 0.696 | 0.009118868 |
| PARD3     | chr10 | 34661425  | 34661464  | 0.463 | 0.590 | 0.000233469 | 0.544 | 0.004960572 |
| AMBRA1    | chr11 | 46534276  | 46534363  | 0.079 | 0.259 | 0.000234066 | 0.313 | 0.000389518 |
| SYNE2     | chr14 | 64682003  | 64682072  | 0.656 | 0.441 | 0.000236939 | 0.553 | 2.13386E-06 |
| RWDD3     | chr1  | 95705332  | 95705465  | 0.592 | 0.371 | 0.000246702 | 0.221 | 6.72129E-09 |
| ZNF195    | chr11 | 3381949   | 3382018   | 0.920 | 0.820 | 0.000258852 | 0.804 | 2.07499E-05 |
| SMARCA4   | chr19 | 11144442  | 11144541  | 0.951 | 0.890 | 0.000260391 | 0.900 | 0.000729737 |
| RTN2      | chr19 | 45996417  | 45996636  | 0.153 | 0.092 | 0.000315998 | 0.057 | 1.8777E-13  |
| TNK2      | chr3  | 195594039 | 195594129 | 0.167 | 0.552 | 0.000352368 | 0.316 | 0.035190714 |
| MAP3K4    | chr6  | 161519309 | 161519459 | 0.268 | 0.538 | 0.00035375  | 0.400 | 0.000101963 |
| TMEM254   | chr10 | 81850135  | 81850187  | 0.714 | 0.929 | 0.000374794 | 0.913 | 0.001828411 |
| FAM60A    | chr12 | 31457915  | 31458057  | 0.579 | 0.504 | 0.000389311 | 0.473 | 2.28588E-06 |
| SIRT2     | chr19 | 39389018  | 39389065  | 0.709 | 0.803 | 0.000456743 | 0.793 | 1.32468E-05 |
| ZNF611    | chr19 | 53233158  | 53233258  | 0.407 | 0.200 | 0.000465258 | 0.074 | 3.75028E-11 |
| ZFYVE21   | chr14 | 104196129 | 104196183 | 0.726 | 0.873 | 0.000548477 | 0.875 | 0.000456439 |
| CPNE1     | chr20 | 34246851  | 34246904  | 0.838 | 0.745 | 0.0006072   | 0.697 | 2.41418E-09 |
| PPP6R2    | chr22 | 50875416  | 50875497  | 0.388 | 0.260 | 0.000622235 | 0.269 | 2.73232E-08 |
| BID       | chr22 | 18232870  | 18232940  | 0.082 | 0.172 | 0.000644186 | 0.136 | 1.83007E-18 |
| TSFM      | chr12 | 58186768  | 58186856  | 0.166 | 0.100 | 0.00068787  | 0.087 | 4.86889E-07 |
| ARMC8     | chr3  | 137907296 | 137907372 | 0.559 | 0.289 | 0.000751167 | 0.273 | 0.000805218 |
| PATZ1     | chr22 | 31724772  | 31724845  | 0.688 | 0.414 | 0.000811088 | 0.419 | 0.001758145 |
| ABLIM3    | chr5  | 148622053 | 148622101 | 0.529 | 0.828 | 0.000829069 | 0.750 | 0.040423979 |
| RAB11FIP1 | chr8  | 37728795  | 37730697  | 0.445 | 0.246 | 0.000856668 | 0.328 | 0.016636286 |
| METTL21B  | chr12 | 58168411  | 58168550  | 0.667 | 0.300 | 0.000934834 | 0.529 | 0.006981285 |
| PI4KB     | chr1  | 151282686 | 151282731 | 0.880 | 0.682 | 0.001028141 | 0.750 | 0.043737503 |
| PLEKHA4   | chr19 | 49360678  | 49360753  | 0.256 | 0.127 | 0.001046642 | 0.081 | 1.44075E-06 |
| ATXN7     | chr3  | 63983296  | 63983363  | 0.839 | 0.955 | 0.001133793 | 0.917 | 0.005792855 |
| PCSK6     | chr15 | 101871855 | 101871894 | 0.618 | 0.353 | 0.001238627 | 0.231 | 4.12846E-07 |
| KDM6A     | chrX  | 44921891  | 44921993  | 0.507 | 0.333 | 0.001265037 | 0.436 | 0.020937475 |
| SCEL      | chr13 | 78167648  | 78167708  | 0.167 | 0.450 | 0.001271231 | 0.267 | 0.018770972 |
| UBAP2     | chr9  | 33956076  | 33956144  | 0.278 | 0.204 | 0.001312403 | 0.151 | 3.67449E-07 |
| DTNBP1    | chr6  | 15660613  | 15660752  | 0.900 | 0.848 | 0.001314945 | 0.781 | 4.68516E-05 |
| CHID1     | chr11 | 908541    | 908645    | 0.410 | 0.551 | 0.001350014 | 0.520 | 0.000510498 |
| TCERG1    | chr5  | 145847903 | 145847966 | 0.760 | 0.898 | 0.001370346 | 0.848 | 0.012878571 |

|          |               |           |           |       |       |             |       |             |
|----------|---------------|-----------|-----------|-------|-------|-------------|-------|-------------|
| REPIN1   | chr7          | 150067848 | 150067973 | 0.323 | 0.520 | 0.00138839  | 0.452 | 0.035166532 |
| ZNF567   | chr19         | 37185703  | 37185778  | 0.222 | 0.383 | 0.001399164 | 0.429 | 0.032679337 |
| SNX11    | chr17         | 46188069  | 46188129  | 0.929 | 0.629 | 0.001535965 | 0.605 | 0.00063928  |
| ZDHHC20  | chr13         | 21956039  | 21956084  | 0.806 | 0.915 | 0.001541612 | 0.968 | 4.89265E-15 |
| ZNF586   | chr19         | 58287910  | 58288037  | 0.182 | 0.119 | 0.001602601 | 0.000 | 0           |
| SENP1    | chr12         | 48482945  | 48483076  | 0.750 | 0.691 | 0.001632615 | 0.600 | 0.045500264 |
| LPIN1    | chr2          | 11916211  | 11916319  | 0.600 | 0.833 | 0.001745119 | 0.846 | 0.038728723 |
| ITGB3BP  | chr1          | 63913235  | 63913285  | 0.406 | 0.588 | 0.0019083   | 0.469 | 0.001802222 |
| NEDD4L   | chr18         | 56002709  | 56002769  | 0.617 | 0.785 | 0.001915443 | 0.741 | 0.01421927  |
| SLC16A4  | chr1          | 110925455 | 110925588 | 0.132 | 0.204 | 0.001970957 | 0.196 | 0.014972993 |
| OPTN     | chr10         | 13150137  | 13150289  | 0.471 | 0.544 | 0.002030326 | 0.572 | 6.9178E-10  |
| BCOR     | chrX          | 39930889  | 39930943  | 0.368 | 0.238 | 0.002071698 | 0.250 | 0.000232413 |
| PIGQ     | chr16         | 632247    | 632309    | 0.582 | 0.719 | 0.002559506 | 0.827 | 1.98313E-10 |
| ADAM15   | chr1          | 155034379 | 155034593 | 0.773 | 0.644 | 0.002613575 | 0.677 | 2.88956E-06 |
| PHB      | chr17         | 47491603  | 47491695  | 0.936 | 0.884 | 0.00261563  | 0.886 | 0.005348308 |
| RGS5     | chr1          | 163288971 | 163289081 | 0.231 | 0.429 | 0.002699796 | 0.333 | 0.002054719 |
| STAU1    | chr20         | 47782533  | 47782822  | 0.620 | 0.735 | 0.002732628 | 0.800 | 4.99753E-06 |
| DSC2     | chr18         | 28648264  | 28648310  | 0.966 | 0.838 | 0.002829961 | 0.843 | 0.006114726 |
| C11orf30 | chr11         | 76165792  | 76165834  | 0.684 | 0.833 | 0.002851707 | 0.875 | 4.01363E-08 |
| PPARG    | chr3          | 12353878  | 12353952  | 0.125 | 0.389 | 0.003046813 | 0.448 | 9.51406E-05 |
| RPRD2    | chr1          | 150414356 | 150414434 | 0.238 | 0.132 | 0.003083186 | 0.054 | 0.000118633 |
| ZNF426   | chr19         | 9645863   | 9645955   | 0.240 | 0.111 | 0.003431579 | 0.000 | 0           |
| NCOA7    | chr6          | 126117825 | 126117943 | 0.500 | 0.792 | 0.0042626   | 0.590 | 0.001213585 |
| RNF24    | chr20         | 3954978   | 3955047   | 0.552 | 0.417 | 0.004444005 | 0.361 | 0.019361888 |
| GLT8D1   | chr3          | 52738739  | 52738968  | 0.444 | 0.364 | 0.005266097 | 0.368 | 0.020497166 |
| PPP3CC   | chr8          | 22396981  | 22397011  | 0.582 | 0.435 | 0.00601383  | 0.500 | 2.60137E-09 |
| TMEM139  | chr7          | 142983033 | 142983295 | 0.265 | 0.450 | 0.006061304 | 0.457 | 0.004977435 |
| PEX2     | chr8          | 77900542  | 77900574  | 0.217 | 0.444 | 0.006084855 | 0.467 | 0.000299834 |
| EHMT2    | chr6_cox_hap2 | 3366499   | 3366601   | 0.385 | 0.296 | 0.006376191 | 0.280 | 0.000843559 |
| RPH3AL   | chr17         | 183549    | 183725    | 0.176 | 0.524 | 0.006456803 | 0.429 | 0.014305878 |
| LGALS8   | chr1          | 236706214 | 236706340 | 0.214 | 0.295 | 0.006850281 | 0.323 | 0.000573799 |
| PI4KB    | chr1          | 151297220 | 151297393 | 0.550 | 0.273 | 0.00717285  | 0.250 | 3.85962E-06 |
| EDC3     | chr15         | 74979431  | 74979520  | 0.748 | 0.843 | 0.007241681 | 0.859 | 1.04835E-05 |
| PPP2R5C  | chr14         | 102384167 | 102384284 | 0.667 | 0.544 | 0.007288846 | 0.558 | 0.000445322 |
| SAR1B    | chr5          | 133967766 | 133967885 | 0.813 | 0.894 | 0.007439181 | 0.903 | 8.1126E-05  |

|         |       |           |           |       |       |             |       |             |
|---------|-------|-----------|-----------|-------|-------|-------------|-------|-------------|
| RNF121  | chr11 | 71673197  | 71673335  | 0.746 | 0.816 | 0.00801918  | 0.843 | 1.0222E-05  |
| MON2    | chr12 | 62959793  | 62959811  | 0.132 | 0.193 | 0.00839768  | 0.262 | 0.000286281 |
| CPNE1   | chr20 | 34243123  | 34243266  | 0.328 | 0.194 | 0.008625071 | 0.148 | 1.66072E-05 |
| ZFAND6  | chr15 | 80390757  | 80390920  | 0.510 | 0.427 | 0.009031927 | 0.416 | 1.03549E-09 |
| SCML1   | chrX  | 17762190  | 17762339  | 0.276 | 0.435 | 0.009300969 | 0.367 | 0.042242834 |
| C8orf58 | chr8  | 22460073  | 22460156  | 0.036 | 0.182 | 0.009374768 | 0.211 | 0.000576613 |
| STAU2   | chr8  | 74439925  | 74440039  | 0.000 | 0.214 | 0.009494967 | 0.467 | 6.79535E-06 |
| MKNK1   | chr1  | 47025905  | 47025949  | 0.438 | 0.309 | 0.010619752 | 0.295 | 2.58689E-08 |
| ATP2C1  | chr3  | 130613551 | 130613619 | 0.469 | 0.286 | 0.011519688 | 0.222 | 0.001228868 |
| TFIP11  | chr22 | 26907084  | 26907161  | 0.860 | 0.943 | 0.011541343 | 1.000 | 0           |
| ARMC8   | chr3  | 137907242 | 137907372 | 0.500 | 0.379 | 0.011582142 | 0.448 | 0.014943839 |
| CBLL1   | chr7  | 107392989 | 107393062 | 0.724 | 0.596 | 0.011901583 | 0.468 | 8.67111E-06 |
| DDX42   | chr17 | 61852467  | 61852538  | 0.938 | 0.868 | 0.011939353 | 0.813 | 0.000700779 |
| UBE2V1  | chr20 | 48713208  | 48713348  | 0.714 | 0.417 | 0.012171501 | 0.500 | 4.45571E-05 |
| URGCP   | chr7  | 43927388  | 43927415  | 0.071 | 0.250 | 0.012615667 | 0.294 | 2.05964E-05 |
| SCAI    | chr9  | 127828268 | 127828337 | 0.682 | 0.864 | 0.01295358  | 0.850 | 0.018285088 |
| ZMYM5   | chr13 | 20412839  | 20413125  | 0.106 | 0.161 | 0.013348631 | 0.181 | 0.028393576 |
| ARMC6   | chr19 | 19144939  | 19145047  | 0.556 | 0.400 | 0.013808208 | 0.378 | 0.020933765 |
| DNMT3A  | chr2  | 25472525  | 25472593  | 0.222 | 0.059 | 0.013808208 | 0.067 | 0.033894854 |
| NDUFA5  | chr7  | 123186711 | 123186871 | 0.481 | 0.625 | 0.015785006 | 0.708 | 0.004832241 |
| ADAM15  | chr1  | 155034379 | 155034451 | 0.575 | 0.492 | 0.017388275 | 0.494 | 0.005975716 |
| ZCCHC10 | chr5  | 132358532 | 132358598 | 0.659 | 0.478 | 0.017937194 | 0.345 | 2.85326E-05 |
| LRR1    | chr14 | 50074117  | 50074839  | 0.332 | 0.402 | 0.018403503 | 0.450 | 0.000197502 |
| UBXN11  | chr1  | 26627416  | 26627515  | 0.087 | 0.300 | 0.019630657 | 0.471 | 5.96313E-06 |
| PARP11  | chr12 | 3938075   | 3938196   | 0.556 | 0.333 | 0.020136752 | 0.364 | 0.002496909 |
| PCBP4   | chr3  | 51996825  | 51996908  | 0.710 | 0.775 | 0.022254125 | 0.821 | 0.010866887 |
| CD55    | chr1  | 207513735 | 207513853 | 0.807 | 0.752 | 0.022315349 | 0.739 | 5.10856E-06 |
| SS18L1  | chr20 | 60729336  | 60729521  | 0.117 | 0.255 | 0.023112086 | 0.299 | 0.003028156 |
| ZNF461  | chr19 | 37134695  | 37134764  | 0.222 | 0.325 | 0.023890503 | 0.472 | 0.006788201 |
| STRN3   | chr14 | 31398406  | 31398517  | 0.242 | 0.378 | 0.024117893 | 0.575 | 0.000232624 |
| TMED3   | chr15 | 79606882  | 79606997  | 0.786 | 0.840 | 0.026545566 | 0.848 | 0.000103934 |
| NFAT5   | chr16 | 69602397  | 69602451  | 0.471 | 0.561 | 0.027806895 | 0.636 | 4.26305E-07 |
| ARRB1   | chr11 | 74982744  | 74982768  | 0.724 | 0.917 | 0.028161035 | 1.000 | 0           |
| SMEK2   | chr2  | 55805382  | 55805478  | 0.279 | 0.172 | 0.028442742 | 0.184 | 0.006131953 |
| RWDD1   | chr6  | 116894020 | 116894148 | 0.837 | 0.681 | 0.029015953 | 0.500 | 7.55375E-06 |

|         |       |           |           |       |       |             |       |             |
|---------|-------|-----------|-----------|-------|-------|-------------|-------|-------------|
| ARFIP1  | chr4  | 153711910 | 153712027 | 0.888 | 0.938 | 0.029936448 | 0.970 | 1.94016E-07 |
| USP4    | chr3  | 49348946  | 49349087  | 0.255 | 0.153 | 0.030913176 | 0.125 | 0.00030213  |
| ALCAM   | chr3  | 105270987 | 105271026 | 0.156 | 0.279 | 0.031981984 | 0.256 | 0.044067405 |
| DMTN    | chr8  | 21924595  | 21924670  | 0.051 | 0.132 | 0.032542321 | 0.196 | 3.9763E-08  |
| CEP57   | chr11 | 95528679  | 95528723  | 0.960 | 0.899 | 0.032988379 | 0.857 | 0.000417164 |
| DCP1A   | chr3  | 53372117  | 53372172  | 0.815 | 0.920 | 0.033044382 | 1.000 | 0           |
| RNF121  | chr11 | 71668272  | 71668310  | 0.163 | 0.113 | 0.033755564 | 0.108 | 8.85211E-05 |
| DSN1    | chr20 | 35399827  | 35399876  | 0.170 | 0.103 | 0.034755584 | 0.075 | 0.003667654 |
| ANKRD10 | chr13 | 111546455 | 111546549 | 0.236 | 0.138 | 0.035833725 | 0.114 | 0.000306415 |
| GAS8    | chr16 | 90102040  | 90102095  | 0.050 | 0.175 | 0.037468157 | 0.237 | 0.004103253 |
| EPB41   | chr1  | 29385100  | 29385157  | 0.541 | 0.593 | 0.038728723 | 0.706 | 5.14621E-09 |
| EIF4E2  | chr2  | 233438972 | 233439051 | 0.750 | 0.660 | 0.038794554 | 0.563 | 0.002496909 |
| NIPA2   | chr15 | 23027800  | 23027922  | 0.531 | 0.454 | 0.03883638  | 0.410 | 0.000299885 |
| DDX19B  | chr16 | 70346511  | 70346560  | 0.162 | 0.217 | 0.038903432 | 0.305 | 5.9477E-10  |
| ZNF83   | chr19 | 53119970  | 53120094  | 0.143 | 0.263 | 0.041111122 | 0.429 | 1.09397E-08 |
| FBXO16  | chr8  | 28331288  | 28331324  | 0.034 | 0.176 | 0.041226833 | 0.300 | 0.002117896 |
| CCSER2  | chr10 | 86259630  | 86259715  | 0.843 | 0.911 | 0.042945123 | 0.917 | 0.035557906 |
| RBPMS   | chr8  | 30407016  | 30407102  | 0.811 | 0.686 | 0.043430363 | 0.603 | 0.002451561 |
| FAM135A | chr6  | 71195869  | 71195947  | 0.603 | 0.714 | 0.043651274 | 0.810 | 9.44195E-07 |
| PREPL   | chr2  | 44586635  | 44586889  | 0.100 | 0.222 | 0.044546814 | 0.243 | 0.00717285  |
| TCF7L2  | chr10 | 114849158 | 114849299 | 0.467 | 0.552 | 0.047288437 | 0.675 | 0.001106063 |
| PARP11  | chr12 | 3973001   | 3973123   | 0.412 | 0.211 | 0.047809587 | 0.000 | 0           |
| DSTYK   | chr1  | 205117332 | 205117467 | 0.056 | 0.132 | 0.04937601  | 0.216 | 1.91394E-06 |
| COG6    | chr13 | 40230962  | 40231027  | 0.857 | 1.000 | 0           | 0.978 | 1.45167E-05 |

**PSI=Percentage Spliced In. P-values were calculated by Chi-square test.**

**Table S5. Oligos used in the study.**

|                  |                                                |                                          |                                                  |
|------------------|------------------------------------------------|------------------------------------------|--------------------------------------------------|
| hsa-circURI1-F   | GTCCATACTAATGAAGTCAC                           | For circURI1 qPCR in human               | Fig. 1D, 1G, 2A, 2E, 2I, 3B, 3D-E, 4B, 4E et al. |
| hsa-circURI1-R   | CAAGGTGCTGAGTCTTTCTC                           |                                          |                                                  |
| h-URI1-F         | TGAAGAAGTACTAGAGAGACAGG                        | For URI1 mRNA qPCR in human              | Fig. 1D, 2A, 2E, 2I, 3D, S3B, S4A                |
| h-URI1-R         | GCATCGCATTACATTTGTG                            |                                          |                                                  |
| Q-18S-F          | CGGCGACGACCCATTGGAAC                           | For 18S qPCR in human                    | Fig. 1G, 3B, 3D, S2A                             |
| Q-18S-R          | GAATCGAACCTGATTCCC                             |                                          |                                                  |
| circURI1-Probe-F | TAATACGACTCACTATAGGGA<br>GAATCAGGCAAGGTGCTGAGT | For circURI1 NB and FISH probes in human | Fig. 1E-G, S2G                                   |
| circURI1-Probe-R | CCAGGAAAACCTGTCCATAC                           |                                          |                                                  |
| URI1-Probe-F     | TAATACGACTCACTATAGGGA<br>GACTCTACTTCGAGACTTCAG | FISH probes for URI1 mRNA                | Fig. 1F                                          |
| URI1-Probe-R     | ATGATGATGACGACGACGAC                           |                                          |                                                  |
| CDR1as-F         | AACTACCCAGTCTTCCATCA                           | For CDR1as qPCR in human                 | Fig. S2B                                         |
| CDR1as-R         | AGACTTGAAGTCGCTGGAAG                           |                                          |                                                  |
| mus-circURI1-F   | AAAGTGCTCAGCCAAGCAGG                           | For circURI1 RT-PCR in mouse             | Fig. S2E                                         |
| mus-circURI1-R   | CAAGGTCCTCAGCCTCTCTT                           |                                          |                                                  |
| mus-Uri1-F       | AGAAAGAGGAAGCCAAACGG                           | For URI1 mRNA RT-PCR in mouse            |                                                  |
| mus-Uri1-R       | GTTCTCTTGGAGTTCGTCCA                           |                                          |                                                  |
| mus-circMed131-R | CTGAAATTATGGGTCCACAGT                          | For circMED131 RT-PCR in mouse           |                                                  |
| mus-circMed131-F | AAGAGCTCTGGATATTCTGGT                          |                                          |                                                  |
| U6-F             | CGCTTCGGCAGCACATATAC                           | For U6 qPCR in human                     | Fig. S2I                                         |
| U6-R             | TTCACGAATTTGCGTGTCAT                           |                                          |                                                  |
| GAPDH-F          | CTTCATTGACCTCAACTACATG                         | For GAPDH qPCR in human                  | Fig. S2B, S2I, S4J                               |
| GAPDH-R          | CTCGCTCCTGGAAGATGGTGA                          |                                          |                                                  |
| circHIPK3-F      | ATGTTGGTGGATCCTGTTTCG                          | For circHIPK3 qPCR in human              | Fig. S4H                                         |
| circHIPK3-R      | GGGTAGACCAAGACTTGTGA                           |                                          |                                                  |
| EIciPAIP2-F      | AGCTCGAGATCTCCCACAAA                           | For EIciPAIP2 qPCR in human              |                                                  |
| EIciPAIP2-R      | ACTGCTGCGACTTGGATCTT                           |                                          |                                                  |
| circURI1-Probe   | Biotin-TTATCTACCTTCTTCGTT<br>CTTTCCGGTGCT      | Antisense oligo of circURI1              | Fig. 3A-C                                        |
| Scramble         | Biotin-TTCTCCGAACGTGTCAC<br>GTTCGAACGTGTC      | Control oligo                            |                                                  |
| circCDYL-F       | GGCCACAGGCTTAGCTGTTA                           | For circCDYL qPCR in human               | Fig. 3D                                          |
| circCDYL-R       | TGTCGTCTCGCTGTCATAG                            |                                          |                                                  |
| hnRNPM-F         | GACATCAAGATGGAGAATGG                           | For hnRNPM qPCR in human                 | Fig. 5D-E                                        |
| hnRNPM-R         | CACTCAGCTTCATGCCATTC                           |                                          |                                                  |
| siNC             | UUCUCCGAACGUGUCACGU<br>ACGUGACACGUUCGGAGAA     | Negative control of siRNAs               | Fig. 2A-C, 5E, 6D, 7B-D et al.                   |
| siCirc-1         | CGGAAAGAACGAAGAAGGUA<br>UACCUUCUUCGUUCUUCGG    | siRNAs of circURI1 in human              | Fig. 2A-C, 5E, 6D, 7B-D et al.                   |

|                     |                                                                    |                                                         |                             |
|---------------------|--------------------------------------------------------------------|---------------------------------------------------------|-----------------------------|
| siCirc-2            | CACCGGAAAGAACGAAGAAG<br>CUUCUUCGUUCUUUCCGGUG                       |                                                         |                             |
| circURI1-sgRNA1     | GTATATTAGCGAAAGAGAAT                                               | sgRNAs for<br>circURI1 knockout<br>construction         | Fig. 2D                     |
| circURI1-sgRNA2     | GAGAGGCTTCGCTTCAGTA                                                |                                                         |                             |
| circURI1-sgRNA3     | GTATTTTTCTGTTGTTGGG                                                |                                                         |                             |
| circURI1-sgRNA4     | GTATGTCTATTAGGTCTAAT                                               |                                                         |                             |
| circURI1 KO check-F | TTGGAGACTCTAATTGCAAA                                               | Check primers for<br>circURI1 KO cells                  |                             |
| circURI1 KO check-R | TACATACATACCTAACAGAG                                               |                                                         |                             |
| circURI1 shRNA-1F   | CCGGCGGAAAGAACGAAGAA<br>GGTAGCTCGAGCTACCTTCTTC<br>GTTCTTTCCGTTTTTG | shRNAs for knock<br>down circURI1                       | Fig. 2L, S4F                |
| circURI1 shRNA-1R   | AATTCAAAAACGGAAAGAACG<br>AAGAAGGTAGCTCGAGCTACC<br>TTCTTCGTTCTTTCCG |                                                         |                             |
| circURI1 shRNA-2F   | CCGGCACCGGAAAGAACGAA<br>GAAGGCTCGAGCCTTCTTCGTT<br>CTTTCCGGTGTTTTTG |                                                         |                             |
| circURI1 shRNA-2R   | AATTCAAAAACACCGGAAAGA<br>ACGAAGAAGGCTCGAGCCTTC<br>TTCGTTCTTTCCGGTG |                                                         |                             |
| OE circURI1-F       | GCTTGGTACCGAGCTCGGATC<br>CGGTCCAGATAGTCTTGTATC                     | For circURI1<br>overexpression in<br>human              | Fig. 2H                     |
| OE circURI1-R       | GTGATGGATATCTGCAGAATT<br>CCTGTAATCTCAGCTACTCAG                     |                                                         |                             |
| circURI1-M19-F      | CAAGCAGTCGGACTAGTCGAA<br>CACCGGAAAGAACGTAGG                        | For overexpressing<br>circURI1 with<br>19-nt mutation   | Fig. 5A-C                   |
| circURI1-M19-R      | TTCGACTAGTCCGACTGCTTGC<br>TTTGCTGAGCACTTTCG                        |                                                         |                             |
| NC-ASO              | U*U*C*U*C*CGAACGTGTCA*C<br>*G*U*U*                                 | ASO of circURI1<br>in human                             | Fig. S4C-E                  |
| circURI1-ASO        | U*A*C*C*U*TCTTCGTTCTU*U<br>*C*C*G*                                 |                                                         |                             |
| siM-1               | GAAGUCCUAAACAAGCAUA<br>UAUGCUUGUUUAGGACUUC                         | hnRNPM siRNAs<br>in human                               | Fig. 5E, 6D,<br>7B-D et al. |
| siM-2               | AUAUGCCAAUCCAACUAAA<br>UUUAGUUGGAUUGGCAUUAU                        |                                                         |                             |
| Flag-hnRNPM-FL-F    | AGGATGACGATGACAAGCTTA<br>TGGCGGCAGGGGTCGAAGC                       | Plasmid for full<br>length hnRNPM in<br>human           | Fig. 4A                     |
| Flag-hnRNPM-FL-R    | ATGAGTTTTTGTTCGGATCCTT<br>AAGCGTTTCTATCAATTC                       |                                                         |                             |
| Flag-hnRNPM-D1-F    | TGACAAGCTTTACAGAGCCTT<br>CATTACAAACA                               | Plasmid for<br>Del_0-70aa<br>truncation of<br>hnRNPM in |                             |
| Flag-hnRNPM-D1-R    | AGGCTCTGTAAAGCTTGTCAT                                              |                                                         |                             |

|                  |                                                                                      |                                             |            |
|------------------|--------------------------------------------------------------------------------------|---------------------------------------------|------------|
|                  | CGTCATCCTTG                                                                          | human                                       |            |
| Flag-hnRNPM-D2-F | CAACTAAAAGAGGTGAACATG<br>CCAGGAGAGCA                                                 | Plasmid for<br>Del_71-149aa                 |            |
| Flag-hnRNPM-D2-R | ATGTTACCTCTTTTAGTTGGA<br>TTGGCATATG                                                  | truncation of<br>hnRNPM in<br>human         |            |
| Flag-hnRNPM-D3-F | AGATCCTGATAGCACAGTATT<br>TGTAGCAAATC                                                 | Plasmid for<br>Del_150-203aa                |            |
| Flag-hnRNPM-D3-R | ATACTGTGCTATCAGGATCTTC<br>TTTGACTTTC                                                 | truncation of<br>hnRNPM in<br>human         |            |
| Flag-hnRNPM-D4-F | AAGACTTGGAGCCTTACCAAA<br>AGGAGATTCT                                                  | Plasmid for<br>Del_204-281aa                |            |
| Flag-hnRNPM-D4-R | TTGGTAAGGCTCCAAGTCTTCC<br>AGCCTGTAAT                                                 | truncation of<br>hnRNPM in<br>human         |            |
| Flag-hnRNPM-D5-F | GGATGAGAGGTGCCAGATATT<br>TGTGAGAAATC                                                 | Plasmid for<br>Del_282-652aa                |            |
| Flag-hnRNPM-D5-R | ATATCTGGCACCTCTCATCCAT<br>CTTGACGTGC                                                 | truncation of<br>hnRNPM in<br>human         |            |
| Flag-hnRNPM-D6-F | CAGGAAGGCCGGATCCGAACA<br>AAAACCTCATCT                                                | Plasmid for<br>Del_653-729aa                |            |
| Flag-hnRNPM-D6-R | GCCACCCGGGGCCTTCCTGG<br>CCACCCAGGA                                                   | truncation of<br>hnRNPM in<br>human         |            |
| DNA linker       | 5'-rApp-AGATCGGAAGAGCAC<br>ACGTCTGAAC/AzideT/CCAGTC<br>AC-3'                         |                                             |            |
| RT-primer        | NNCAAGTGNAGATCGGAAGA<br>GCGTCGTGTAGGGAAAGAGTG<br>ACTGGAGTTCAGACGTGTGCT<br>CTTCCGATCT | hnRNPM<br>iCLIP-seq                         | Fig. 4D    |
| First outer-F    | CGCTCCCGCTGAATTGGAATTT<br>TTTTTTTTTTTTT                                              |                                             |            |
| First outer-R1   | ATCAGGCAAGGTGCTGAGTC                                                                 |                                             |            |
| First outer-R2   | GTGACTTCATTAGTATGGAC                                                                 |                                             |            |
| First outer-R3   | TTGCTGAGCACTTTGCAAAC                                                                 |                                             |            |
| Second nested-F  | CGCTCCCGCTGAATTGGAAT                                                                 |                                             |            |
| Second nested-R1 | TGCTGAGTCTTTCTCGAAGG                                                                 |                                             |            |
| Second nested-R2 | GCCAAATGGTACCATTATAT                                                                 |                                             |            |
| Second nested-R3 | CAAGGTGCTGAGTCTTTCTC                                                                 |                                             |            |
|                  |                                                                                      | First PCR for<br>individual-CLIP            | Fig. S5B-C |
|                  |                                                                                      | Second nested<br>PCR for<br>individual-CLIP |            |



|                               |                                                |                                                                     |                  |
|-------------------------------|------------------------------------------------|---------------------------------------------------------------------|------------------|
| circURI1-T7-F                 | TAATACGACTCACTATAGGGA<br>GAGGTTCTACATAAATGCCTA | Primers for <i>in vitro</i><br>circularization of<br>circURI1       | Fig. 4E          |
| circURI1-T7-R                 | AGTCCTACAATTTAGCACGG                           |                                                                     |                  |
| circURI1-M19-F                | GAAAACATGTTCTTTCCGGTGT<br>GCTTTGCTGAGCACTTTGC  | Primers for <i>in vitro</i><br>circularization of<br>circURI1-M19   | Fig. S5D         |
| circURI1-M19-R                | CACCGGAAAGAACATGTTTTTC                         |                                                                     |                  |
| 29 nt in the junction<br>site | ATGTTTTCTTGGGT<br>CTACCGTTTAATATT              | Added sequences<br>for circularization                              | Fig. S5D         |
| GMPR2-AS-F                    | CATCATTGCTGCCAATATGG                           | For<br>semi-quantitative<br>RT-PCR check of<br>alternative splicing | Fig. 6D, 7C, S7C |
| GMPR2-AS-R                    | GCTATAGTGCTTATGGACAG                           |                                                                     |                  |
| VEGFA-AS-F                    | AGTTCGAGGAAAGGGAAAGG                           |                                                                     |                  |
| VEGFA-AS-R                    | CTTTCCTGGTGAGAGATCTG                           |                                                                     |                  |
| SCEL-AS-F                     | CAGATACATCCACCTAAACC                           |                                                                     |                  |
| SCEL-AS-R                     | CTGAAGAGACTATCAAGACC                           |                                                                     |                  |
| LGALS8-AS-F                   | CTAGTCTGGAAGTACAGAG                            |                                                                     |                  |
| LGALS8-AS-R                   | GCATTTGCATTCACCTCTCC                           |                                                                     |                  |
| DNMT3A-AS-F                   | CAGCTACTCCAGAGCTTCA                            |                                                                     |                  |
| DNMT3A-AS-R                   | TCCACAGCATTCATTCCTGC                           |                                                                     |                  |
| NR4A1-AS-F                    | GAGTGCACAGAAGAAGCTTCG                          |                                                                     |                  |
| NR4A1-AS-R                    | TGGTGTCCCATATTGGGCTT                           |                                                                     |                  |
| RNF24-AS-F                    | TGACGGTCCCGCACGTCT                             |                                                                     |                  |
| RNF24-AS-R                    | GTTGAGAGGCAGATTCTGG                            |                                                                     |                  |
| DNAJB5-AS-F                   | GAGCTGAGTGACAGGAAGAC                           |                                                                     |                  |
| DNAJB5-AS-R                   | ATCACAGCCACTGGACCAG                            |                                                                     |                  |
| B3GALNT2-AS-F                 | AAACTGGCTGGTGCTGCTGT                           |                                                                     |                  |
| B3GALNT2-AS-R                 | CCAACCTACCACATCATAGTG                          |                                                                     |                  |
| LPIN1-AS-F                    | CAGCCTCATAACCTAATTCG                           |                                                                     |                  |
| LPIN1-AS-R                    | CTTCCGTGGACTTGCTGAC                            |                                                                     |                  |
| SNX11-AS-F                    | CTTCTCCTCCTTCTTTGTTC                           |                                                                     |                  |
| SNX11-AS-R                    | GCCTTCTACTCGGCTGATAG                           |                                                                     |                  |
| GMPR2-pre-AS-F                | TTTCATGTCTGCTGCCTGTC                           | Primers for RNA<br>IP of hnRNPM<br>upon circURI1<br>knockdown       | Fig. 7D          |
| GMPR2-pre-AS-R                | GCTGGGATTTGAGTTCAACC                           |                                                                     |                  |
| DNMT3A-pre-AS-F               | GAAAGAGTGACTCTGTCTCC                           |                                                                     |                  |
| DNMT3A-pre-AS-R               | TTAGGAAACCTTCCCTCCAG                           |                                                                     |                  |
| VEGFA-pre-AS-F                | GTAGATTGCAAGCTCAGGAG                           |                                                                     |                  |
| VEGFA-pre-AS-R                | CATAAGAGCAGAGAGGACAG                           |                                                                     |                  |
| DNAJB5-pre-AS-F               | TCACTGACACGCTGCCATAC                           |                                                                     |                  |
| DNAJB5-pre-AS-R               | CACCTCCTTGGACTCTCAGA                           |                                                                     |                  |
| SCEL-pre-AS-F                 | TGTGTGCCATGAGCTGACAT                           |                                                                     |                  |
| SCEL-pre-AS-R                 | CAGGTCAATGATAGTCGAGC                           |                                                                     |                  |
| LGALS8-pre-AS-F               | GCCTGGGTTATTTATGTGG                            |                                                                     |                  |
| LGALS8-pre-AS-R               | CCTCCTCTATTACTAGGCTG                           |                                                                     |                  |
| SNX11-pre-AS-F                | GTGTTACAATTGTAGTGGTCC                          |                                                                     |                  |

|                |                                               |                                               |         |
|----------------|-----------------------------------------------|-----------------------------------------------|---------|
| SNX11-pre-AS-R | TCTGTAGAGCTCTTCTACAC                          |                                               |         |
| VEGFA-FL-F     | AGGATGACGATGACAAGCTTA<br>TGAAC TTTCTGCTGTCTTG | Plasmid for<br>VEGFA with exon<br>7 inclusion | Fig. 7G |
| VEGFA-FL-R     | ATCAGATCTATCGATGAATTCT<br>CACCGCCTCGGCTTGTCAC |                                               |         |
| VEGFA-AS-F     | ATGTGACAAGCCGAGGCGGT                          | Plasmid for<br>VEGFA with exon<br>7 exclusion |         |
| VEGFA-AS-F     | ACCGCCTCGGCTTGTCACATA<br>CGCTCCAGGACTTATACC   |                                               |         |
